1  
2  
3  
4  
5  
6  
7  
8  
9  
10  
11  
12  
13  
14  
15  
16  
17  
18  
19  
20  
21  
22  
23  
24  
25  
26  
27  
28  
29  
30  
31  
32  
33  
34

**Internalization of the host alkaline pH signal in a fungal pathogen**

Short title: pH-dependent cycling of the *C. neoformans* pH sensor

Hannah E. Brown<sup>1,2</sup>, Kaila M. Pianalto<sup>1,2</sup>, Caroline M. Fernandes<sup>3</sup>, Katherine D. Mueller<sup>2</sup>,  
Maurizio Del Poeta<sup>3,4,5</sup>, and J. Andrew Alspaugh<sup>1, 2\*</sup>

<sup>1</sup>Department of Medicine and <sup>2</sup>Department of Molecular Genetics and Microbiology, Duke University School of Medicine, Durham, NC, USA, 27710, <sup>3</sup>Department of Microbiology and Immunology, <sup>4</sup>Division of Infectious Disease, Stony Brook University, Stony Brook, NY, USA, <sup>5</sup>Veterans Administration Medical Center, Northport, NY, USA

\*Corresponding author  
Email: [andrew.alspaugh@duke.edu](mailto:andrew.alspaugh@duke.edu)  
Phone: (919) 684-0045  
Fax: (919) 684-8902

Keywords: membrane; clathrin; alkaline pH; *Cryptococcus*; phospholipids; endocytosis; Rim pathway; pH-sensing; pathogenic fungi

35 **Abstract**

36 The ability for cells to internalize extracellular cues allows them to adapt to novel and stressful  
37 environments. This adaptability is especially important for microbial pathogens that must sense  
38 and respond to drastic changes when encountering the human host. *Cryptococcus neoformans*  
39 is an environmental fungus and opportunistic pathogen that naturally lives in slightly acidic  
40 reservoirs, but must adapt to the relative increase in alkalinity in the human host in order to  
41 effectively cause disease. The fungal-specific Rim alkaline response signaling pathway effectively  
42 converts this extracellular signal into an adaptive cellular response allowing the pathogen to  
43 survive in its new environment. The newly identified Rra1 protein, the most upstream component  
44 of the *C. neoformans* Rim pathway, is an essential component of this alkaline response. Previous  
45 work connected Rra1-mediated signaling to the dynamics of the plasma membrane. Here we  
46 identify the specific mechanisms of Rim pathway signaling through detailed studies of the  
47 activation of the Rra1 protein. Specifically, we observe that the Rra1 protein is internalized and  
48 recycled in a pH-dependent manner, and that this dynamic pattern of localization further depends  
49 on specific residues in its C-terminal tail, clathrin-mediated endocytosis, and the integrity of the  
50 plasma membrane. The data presented here continue to unravel the complex and intricate  
51 processes of pH-sensing in a relevant human fungal pathogen. These studies will further elucidate  
52 general mechanisms by which cells respond to and internalize extracellular stress signals.

53 **Author Summary**

54           The work described here explores the genetics and mechanics of a cellular signaling  
55 pathway in a relevant human fungal pathogen, *Cryptococcus neoformans*. The findings  
56 presented in this manuscript untangle the complex interactions involved in the activation of a  
57 fungal-specific alkaline response pathway, the Rim pathway. Specifically, we find that *C.*  
58 *neoformans* is able to sense an increase in pH within the human host, internalize a membrane-  
59 bound pH-sensor, and activate a downstream signaling pathway enabling this pathogen to  
60 adapt to a novel host environment and effectively cause disease. Revealing the mechanisms of  
61 Rim pathway activation within the larger context of the fungal cell allows us to understand how  
62 and when this microorganism interprets relevant host signals. Furthermore, understanding how  
63 this pathogenic organism converts extracellular stress signals into an adaptive cellular response  
64 will elucidate more general mechanisms of microbial environmental sensing and stress  
65 response.

66

## 67 Introduction

68 The ability for organisms to effectively recognize and transmit signals relating to changes  
69 in the external environment is essential for their survival. For microscopic fungal organisms, the  
70 ability to specifically sense increases in extracellular pH is known to be important for the  
71 production of secondary metabolites [1], the maintenance of the fungal cell wall [2–6], and  
72 virulence in the case of fungal pathogens [7–12]. In many fungi, pH recognition processes include  
73 the fungal-specific Rim/Pal alkaline response pathway, [7,8,11,13,14]. In the context of this  
74 signaling pathway, extracellular pH signals are initiated through cell surface pH-sensing  
75 complexes, which include the Rra/Rim/Pal putative sensors. These signals are then transduced  
76 through Endosomal Sorting Complex Required for Transport (ESCRT)-dependent trafficking.  
77 Further processing of these alkaline signals is completed through the formation of a proteolysis  
78 complex required for cleavage and activation of the Rim101/PacC transcription factor, the terminal  
79 component of the pathway [11]. This protein in turn controls the transcriptional activation of  
80 numerous genes directing pH-mediated adaptive responses.

81 Many of the components of the Rim/Pal pathways are highly conserved across diverse  
82 fungal phyla including the involvement of the ESCRT machinery and formation of the proteolysis  
83 complex. However, the specific pH-sensing proteins present at the cell surface appear to have  
84 diverged in a phylum-dependent manner. For example, fungi in the Ascomycota phylum possess  
85 plasma membrane-associated pH-sensing proteins with a high degree of sequence and structural  
86 similarity – the *Saccharomyces cerevisiae* and *C. albicans* Rim21 proteins, and the orthologous  
87 *Aspergillus fumigatus* and *A. nidulans* PalH proteins. Each of these contain seven membrane-  
88 spanning domains and a cytoplasmic C-terminal domain [8,11].

89 The opportunistic fungal pathogen *C. neoformans* is a notable cause of lethal infections in  
90 highly immunocompromised patients, especially those with advanced HIV disease [15]. In  
91 contrast to many other fungal pathogens of humans, *C. neoformans* belongs to the phylum  
92 Basidiomycota, along with many agricultural pathogens and mushrooms. Rim21 homologs are

93 conspicuously absent from the genomes of the basidiomycete fungi [8]. We recently identified the  
94 *C. neoformans* Rra1 protein as the most upstream component of the *C. neoformans* Rim pathway,  
95 likely serving as the surface alkaline pH sensor [8]. Even though it possesses no sequence  
96 similarity to Rim21, *C. neoformans* Rra1 is also predicted to contain seven transmembrane  
97 domains and a cytoplasmic C-terminal tail, suggesting functional similarity. Also like Rim21  
98 proteins, Rra1 localizes to the plasma membrane in punctate structures during growth at low pH  
99 [16]. At the plasma membrane, this pH sensor is stabilized by the Nucleosome Assembly Protein  
100 1 (Nap1) chaperone [17]. When exposed to alkaline growth conditions, Rra1 senses a pH-induced  
101 shift in phospholipid distribution and charge within the plasma membrane, allowing for its highly  
102 charged C-terminal tail to disassociate from the inner leaflet into the cytosol [16]. A similar model  
103 of plasma membrane-induced activation of the *S. cerevisiae* Rim21 pH sensor has also been  
104 suggested [18]. The structural and functional similarities between these highly diverged pH-  
105 sensing proteins suggests convergent evolution of the most proximal components of fungal pH-  
106 sensing between divergent fungal phyla.

107         The formation of Rra1 membrane-associated puncta at low pH initially led us to further  
108 investigate the connection between Rim pathway activation and plasma membrane dynamics.  
109 We have previously shown that the disruption of lipid rafts in the membrane results in  
110 mislocalization of the Rra1 pH sensor and hypothesized that Rra1 membrane localization is  
111 connected to the formation of distinct membrane domains [16]. While the connection between  
112 extracellular stress and membrane dynamics has been made in *C. neoformans* [19–22], these  
113 associations were the first to connect the Rim pathway and the plasma membrane in this fungal  
114 pathogen. Furthermore, they have revealed potential connections between Rra1 receptor cycling  
115 and pH sensing in general fungal virulence.

116         Several questions remain unanswered regarding microbial/fungal sensing of extracellular  
117 pH. These include how fungal plasma membrane pH sensors, like *C. neoformans* Rra1, become  
118 internalized in response to changes in environmental pH. Also, it is not yet known how changes

119 in Rra1 protein localization affect Rra1 function and Rim pathway activation. Here we show that  
120 *C. neoformans* Rra1 undergoes endocytosis following a shift to alkaline growth conditions and  
121 that this endomembrane localization is important for Rim pathway activation. We observe that  
122 inhibiting the ability of Rra1 to aggregate at the plasma membrane in acidic conditions does not  
123 affect downstream Rim pathway function or growth at alkaline pH. Furthermore, through protein  
124 interaction studies, inhibition experiments, and genetic epistasis, we find that this internalization  
125 mechanism involves clathrin-mediated endocytosis and phosphorylation of the Rra1 C-terminal  
126 tail. Finally, detailed phospholipidomics studies connect the Rim-mediated pH response with the  
127 content of cellular membranes. The studies presented here continue to inform the intricate  
128 mechanism by which this human fungal pathogen senses and responds to changes in its  
129 environment, specifically that of the relatively alkaline human host.

130

131 **Results**

132 ***Rra1 is endocytosed in response to alkaline pH and recycled back to the membrane***

133 Our previous studies identified Rra1 as a membrane-associated upstream component of  
134 the Rim alkaline response pathway in *C. neoformans*. Specifically, we observed that Rra1 is  
135 required for Rim pathway activation and growth at alkaline pH [8] and has a pH-dependent  
136 localization pattern [16]. Furthermore, the Rra1 C-terminal cytoplasmic tail plays an important role  
137 in the localization and function of this putative pH-sensing protein by its differential affinity with  
138 the plasma membrane at different pH's [16].

139 In order to better define *C. neoformans* Rra1 pH-dependent localization, we examined a  
140 detailed time course of Rra1 trafficking in response to alkaline extracellular signals. We used  
141 FM4-64, a dye that tracks endocytic transport from the plasma membrane, and assessed the  
142 colocalization of this dye with a functional, C-terminally tagged Rra1-GFP fusion protein (Rra1-  
143 GFP) [16,23]. In acidic conditions (non-Rim activating conditions), we observed Rra1 enriched in  
144 puncta at the cell surface [16]. A shift from pH 4 to pH 8 resulted in reproducible patterns of pH-  
145 dependent changes in Rra1 localization. After 10 minutes of exposure to alkaline pH, Rra1-GFP  
146 begins to migrate from its sites of plasma membrane aggregation to internal cytoplasmic  
147 structures (Fig 1A). The specific foci of Rra1 internalization colocalize with the FM4-64 dye,  
148 suggestive of endocytic vesicles (Fig 1A). After extended incubation (20 minutes) at alkaline pH,  
149 Rra1 localization changes from surface-associated puncta to endomembranes, including a  
150 perinuclear enrichment consistent with the perinuclear endoplasmic reticulum (ER) (Fig 1A).  
151 Following endocytosis, FM4-64 follows similar patterns of colocalization with Rra1 on these  
152 endomembrane structures (Fig 1A). Furthermore, following activation and endocytosis, we  
153 observed that Rra1 recycles back to the cell surface. Specifically, when cells are incubated in  
154 alkaline conditions (pH 8) and then re-exposed to pH 4 growth conditions, Rra1 repositions itself  
155 in plasma membrane-associated puncta similarly to the original localization pattern observed at  
156 pH 4 (Fig 1B and 1C). We also observed that this recycling efficiency is significantly decreased in

157 the *rim101Δ* mutant strain. In the absence of Rim101, there is a delay in the reestablishment of  
158 Rra1 enrichment in cell surface puncta following a shift from alkaline to acidic pH (Fig 1B and 1C).  
159 Overall, this data revealed that Rra1-GFP undergoes endocytosis from the cell surface to  
160 endomembranes in response to alkaline pH and that this protein recycles back to the cell surface  
161 following activation.

162

### 163 ***Rra1 pH-dependent endocytosis is clathrin-dependent***

164 We assessed the effect of the Pitstop-2 clathrin-mediated endocytosis (CME) inhibitor on  
165 Rra1 pH-induced endocytosis. Cells expressing Rra1-GFP were treated with either Pitstop-2 or  
166 DMSO vehicle control in pH 4 and pH 8 growth conditions. Following a 10-minute Pitstop-2  
167 treatment, we observed alterations in the endocytosis of Rra1 at pH 8. We noted accumulation of  
168 Rra1 in globular structures near the plasma membrane as well as a lack of expected alkaline pH-  
169 mediated endomembrane localization (Fig 2A and 2B). These results indicate that Pitstop-2  
170 clathrin inhibition disrupts alkaline pH-induced perinuclear ER localization of the Rra1 protein. In  
171 contrast, CME inhibition with Pitstop-2 did not lead to a significant alteration in membrane puncta  
172 at pH 4 (Fig S1).

173 To assess whether Pitstop-2 treatment and its associated alterations in Rra1 localization  
174 affect growth at alkaline pH, we incubated wildtype *C. neoformans* cells at a range of pH levels  
175 and exposed to increasing concentrations of Pitstop-2 for 48 hours. In addition to the associated  
176 changes in Rra1 localization, clathrin inhibition with Pitstop-2 also resulted in functional  
177 consequences for growth at elevated pH. Low concentrations of Pitstop-2 (3.4  $\mu$ M) inhibited fungal  
178 growth at an alkaline pH (YPD pH 7.4). However, *C. neoformans* was able to grow at much higher  
179 concentrations of this clathrin inhibitor (> 108  $\mu$ M) in a slightly more acidic medium (YPD pH 6.6)  
180 (Fig 2C).



181 In order to directly assess whether blocking CME leads to defective Rim pathway  
182 signaling, we tested the effects of Pitstop-2 on the nuclear translocation of the Rim101  
183 transcription factor in response to increases in pH. Rim101 is the terminal transcription factor in  
184 the Rim pathway, and its translocation to the nucleus following a shift to alkaline pH is a hallmark  
185 of pathway activation [8]. We observed a dose-dependent decrease in pH-regulated Rim101  
186 nuclear localization following Pitstop-2 treatment compared to vehicle treated cells (Fig 2D).  
187 Together these data indicate that blocking CME results in alkaline pH sensitivity, likely through  
188 inhibition of both Rra1 endocytosis and subsequent Rim101 nuclear translocation.  
189

### 190 ***Rim pathway upstream components interact with endocytosis machinery at alkaline pH***

191 To further assess Rra1 trafficking and interactions of this protein with downstream effectors,  
192 we performed mass spectrometry on proteins co-immunoprecipitated with the Rra1 C-terminus.  
193 The Rra1 C-terminus is a soluble subdomain of the Rra1 protein that we have previously shown  
194 to be required for Rim signal initiation [16]. Focusing on interactors of this domain avoids the need  
195 for strong membrane protein-extracting detergents that might be required for isolation of  
196 membrane proteins, but that also might disrupt physiologically relevant protein interactions. We  
197 were most interested in proteins that interact with the Rra1 C-terminus in Rim pathway-activating  
198 conditions (alkaline pH); therefore, we performed a co-immunoprecipitation using a GFP-tagged  
199 version of the Rra1 C-terminus (GFP-Rra1-Ct) at pH 8. The GFP-Rra1-Ct was  
200 immunoprecipitated from cell lysates using a GFP-Trap resin, and the associated proteins were  
201 analyzed using tandem MS-MS. To exclude potential false-positive interactions, we prioritized  
202 proteins with at least 5 exclusive peptides that were present only in the GFP-Rra1-Ct sample and  
203 not in the control condition (Table S1). At pH 8, Rra1 C-terminus interactors included proteins  
204 typically found on endocytic vesicles, such as coatamer protein subunits, clathrin heavy chain 1,  
205 and archain 1 (Table 1). Also included were multiple T-complex protein subunits that are typically  
206 found to interact with endomembrane-associated proteins (*i.e.*, secretory proteins (Sec27) and

207 COP proteins). The Nap1 chaperone protein was also found to be a strong interactor with the  
208 Rra1 C-terminus at high pH, supporting our previous studies revealing that Nap1 stabilizes the  
209 Rra1 protein, specifically through its interaction with the C-terminus [17]. Furthermore, gene  
210 ontology analysis using FungiFun FunCat [24], revealed protein fate (i.e. protein folding,  
211 modification, and destination) as one of three categories significantly represented in the Rra1-Ct  
212 interactome (blue font in Table 1 and Fig 3A), and COPI-vesicle coat as one of the significant  
213 cellular compartment GO-term categories (red font in Table 1 and Fig 3B). These results are  
214 consistent with our findings outlined above regarding the clathrin-mediated endocytic trafficking  
215 of Rra1 to endomembrane sites of downstream activity (Fig 2). Furthermore, a previously  
216 published protein interaction study assessing proteins co-immunoprecipitated with the full-length  
217 Rra1-GFP in alkaline conditions identified COPI and clathrin subunits among the interacting  
218 partners (Table S1 in [17]). This supports the role for endocytosis machinery in the internalization  
219 of Rra1 in alkaline conditions.

220 As mentioned previously, Rim signaling is initiated by the formation of a Rra1-containing cell  
221 surface pH-sensing complex, and it is completed through the formation of a proteolysis complex  
222 required for Rim101 cleavage. Rim23 is a component of the proteolysis complex, and this protein  
223 displays membrane-associated localization in response to a shift to alkaline pH [8]. Therefore we  
224 were also interested in the interactome of this protein in activating conditions and whether the  
225 Rra1-Ct and Rim23 complexes might interact. We performed a similar protein interaction study  
226 with a GFP-tagged version of Rim23 in alkaline conditions. Similar to those with GFP-Rra1-Ct,  
227 Rim23 interactors were also enriched for coatamer and clathrin-associated proteins at pH 8 (Table  
228 2). FungiFun FunCat gene ontology analysis of the Rim23 interactome revealed cellular transport,  
229 transport facilitation, and transport routes as significantly enriched categories [24]. These proteins  
230 included those involved in vesicle formation and intracellular transport such as coatamer subunits,  
231 clathrin protein Ap47, clathrin heavy chain, and transport protein Sec13 (blue font Table 2 and  
232 Fig 3B). Additionally, the significantly enriched cellular component GO term categories consisted

233 of COPI-vesicle coat, cytoplasmic vesicle, clathrin, and Golgi apparatus (red font Table 2 and Fig  
234 3D). These results indicate that the Rim Sensing/Activation Complex and the Rim Proteolysis  
235 Complex likely physically and temporally converge at common sites during pathway activation  
236 and that these sites contain proteins involved in protein trafficking and CME. We have not  
237 observed a similar pattern of enrichment of endocytic vesicle-associated proteins in other  
238 proteomics experiments [25].

239

#### 240 ***Rra1 pH dependent localization is altered through disruption in membrane composition***

241 We previously identified a Rim-independent mechanism of the fungal alkaline pH  
242 response in which the Sre1 transcription factor and its downstream effectors in the ergosterol  
243 biosynthesis pathway are activated in response to alkaline pH [26]. Other work has also  
244 demonstrated that the *sre1* $\Delta$  mutant has depleted levels of ergosterol in the plasma membrane  
245 and altered abundance of sterol-rich domains, affecting the localization of membrane-associated  
246 proteins [27–29]. We also previously observed that altering the formation of lipid rafts in the  
247 membrane using Filipin III dye results in disruption of Rra1 membrane puncta formation at pH 4  
248 [16]. We therefore assessed the effects of Sre1 mutation on the localization of Rra1.

249 In contrast to wildtype, Rra1 membrane-associated puncta were not observed at pH 4 in  
250 the *sre1* $\Delta$  mutant strain. In this mutant background, Rra1 is localized to endomembranes in both  
251 activating (pH 8) and inactivating conditions (pH 4) (Fig 4A and 4B). However, Rim signaling is  
252 still intact in the *sre1* $\Delta$  mutant background as demonstrated previously by normal processing of  
253 the Rim101 transcription factor in response to elevated pH [26]. Together these data support that  
254 Rra1 membrane puncta are not essential for alkaline-induced Rim signaling. Furthermore, treating  
255 wildtype cells with Filipin III does not lead to decreased growth at alkaline pH despite similar  
256 disruption of cell surface puncta. Wildtype *C. neoformans* cells were able to grow at a range of  
257 increasing pH growth conditions (pH 4,5,6,7, and 8) despite high concentrations of Filipin III (62.5  
258  $\mu$ g/mL) [10  $\mu$ g/mL for microscopy experiments in [26]]. These results indicate that Sre1-mediated

259 ergosterol and membrane homeostasis is essential for Rra1 localization in plasma membrane  
260 puncta at low pH, but that this localization is not necessary for Rim pathway activation.

261

### 262 ***Assessment of Rra1 C-terminus pH-dependent structure and phosphorylation***

263

264 Our recently published studies suggest that the C-terminal tail of Rra1 serves as an “antenna”

265 to mediate pH-dependent interactions with the plasma membrane [16]. These results are further

266 supported through Rra1 structural predictions using various modeling platforms. Two major

267 structural models emerge from the amino acid sequence of the Rra1 protein: one that maintains

268 the C-terminal region tightly compact and one that displays a free and extended C-terminus (Fig

269 S2) [30–32]. These two orientations of the Rra1 C-terminus might represent the bimodal function

270 of this domain as it differentially interacts with the plasma membrane in response to changes in

271 charge of the inner leaflet [16,18]. Furthermore, protein truncation studies demonstrated that the

272 Rra1 C-terminus, and especially the highly charged region (HCR), as graphically represented in

273 Fig 5A, is required for the function of this protein. A mutated form of Rra1-GFP lacking the entire

274 C-terminus after residue 273 [Rra1-273T-GFP (T = truncated)] was unable to restore alkaline

275 growth to the *rra1*Δ mutant (Fig 5F and [16]. In contrast, a truncated Rra1-GFP protein that

276 retained the HCR (Rra1-296T-GFP) completely complemented *rra1*Δ mutant phenotypes (Fig 5F

277 and [16]. This truncated strain revealed localization patterns that mirrored wildtype, however we

278 later learned that this strain also contained a full-length *RRA1-GFP* allele. Repeating these

279 localization in a new strain, with the truncated Rra1-296T-GFP as the cellular source of Rra1,

280 revealed similar localization patterns to wildtype with Rra1-containing membrane puncta at low

281 pH and Rra1 internalization at high pH, identical to the previously published results [16].

282 Interestingly, we noted that at high pH, this truncated strain appeared to have increased levels of

283 Rra1 in endomembrane structures consistent with the robust growth of this strain at high pH (Fig

284 5F).

285        Given the central role for the exposed Rra1 C-terminus in protein function, we hypothesized  
286        that pH-dependent post-translational modifications (PTMs) of the Rra1 protein, specifically within  
287        the C-terminus, would direct its localization and function. We therefore assessed Rra1  
288        phosphorylation patterns at two extremes of pH: pH 4 (Rim pathway non-activating) and pH 8  
289        (Rim pathway activating). We chose to focus on this specific PTM based on (1) DEPP and  
290        PONDR prediction software revealing the Rra1 C-terminus to be highly disordered and positioned  
291        for phosphorylation modifications (Fig 5A and Fig S2) [33,34] (2) our identification of this region  
292        of the Rra1 protein as the site of interaction with downstream proteins such as Nap1 ([17] and  
293        Table 1) and (3) preliminary MS analysis demonstrating pH-dependent changes in Rra1  
294        phosphorylation as described in our methods.

295        As graphically depicted in Fig 5A, we observed two different patterns of Rra1 protein  
296        serine/threonine phosphorylation: residues preferentially phosphorylated at pH 8 and residues  
297        phosphorylated at pH 4. Interestingly, all pH-dependent changes in Rra1 phosphorylation were  
298        present in the cytoplasmic C-terminal tail (Fig 5A). To assess the role of each potential  
299        phosphosite on Rim-regulated cellular functions, we created *RRA1* alleles with alanine mutations  
300        at each of these serine or threonine residues. We prioritized strains with alanine substitutions in  
301        residues preferentially phosphorylated at alkaline pH (Fig 5B). For each strain, we assessed  
302        fluorescent protein localization (epifluorescence microscopy), transcript and protein stability (RT-  
303        PCR and western blots, respectively), and complementation of *rra1* $\Delta$  growth defects at pH 8 (Fig  
304        5B). Most of these mutations did not alter Rra1-GFP localization or function. The one  
305        phosphomutant that did affect the ability to grow at alkaline pH (Rra1-GFP-S329A) displayed  
306        unstable *RRA1* transcript levels at pH 8 and therefore was not prioritized. However, in contrast to  
307        the wildtype Rra1-GFP that localized in PM puncta at acidic pH, one phosphomutant strain (Rra1-  
308        GFP-T317A) displayed reduced plasma membrane puncta at low pH, similar to Rra1 localization  
309        in the *sre1* $\Delta$  mutant (Fig 5C and 5D). We confirmed wildtype expression levels of this mutated  
310        protein by western blot (Fig 5E) and wildtype transcript levels by quantitative real-time PCR (Fig

311 S3B). Given its absent Rra1 puncta at low pH and the inability for Rra1 to cycle to and from the  
312 PM puncta (Fig S3A), we first hypothesized that this strain would display defective Rim signaling.  
313 However, Rra1-T317A fully supported Rim pathway activation as inferred by restoration of growth  
314 at alkaline pH as well as acidic pH (Fig 5B and 5F). This intact signaling is similar to the previously  
315 published strain lacking the region of the Rra1 C-terminus following the HCR (296T truncation)  
316 which involves the removal of the T317 residue (Fig 5B and 5F). Furthermore, this phosphomutant  
317 strain displayed a restoration of the alkaline-induced transcriptional induction of *CIG1* expression,  
318 which is impaired in Rim pathway mutants (Fig S3C [16]). Together these results strongly suggest  
319 that pH-dependent phosphorylation events mediate Rra1 protein localization. They also further  
320 support that plasma membrane microdomains, or membrane puncta, are not the sites of Rra1  
321 interaction with its downstream effectors.

322

### 323 ***pH-dependent phospholipid analysis***

324 In order to further investigate the effect of membrane composition on pH signaling, we  
325 assessed the phospholipid profile of the wildtype strain in response to changes in pH. We  
326 hypothesized that if Rra1 cycling through membrane invagination and endocytosis was important  
327 for pathway activation and growth at alkaline pH, then the membranes associated with this protein  
328 must be changing in a pH-dependent manner to facilitate internalization. This analysis revealed  
329 reproducible increases in two out of the five most abundant phosphatidylethanolamine (PE)  
330 species in alkaline pH (Fig 6A), and a decrease in 6/13 most abundant phosphatidylserine (PS)  
331 and 6/23 most abundant phosphatidylcholine (PC) species in the same alkaline conditions (Fig  
332 6B and 6C, respectively). A majority (10/13) of the most abundant species that were found to be  
333 significantly altered in response to alkaline conditions were unsaturated lipids (Fig 6A-6E,  
334 indicated by #). Unsaturated phospholipids can sterically hinder the formation of lipid rafts in the  
335 plasma membrane.

336 Similar phospholipid analysis in the *rim101* $\Delta$  mutant revealed increased levels of PC and PS  
337 at pH 8 compared to WT and the reconstituted strain. Specifically, at high pH, the *rim101* $\Delta$  mutant  
338 strain displayed a trend of increased levels of all abundant PC and PS species (Fig 6D and 6E).  
339 5/7 of the statistically significant increases in the most abundant PC and PS species were in  
340 unsaturated lipids. These complementary results suggest that the *C. neoformans* Rim pathway is  
341 required to maintain pH-induced alterations in the ratios of specific, abundant phospholipids in  
342 cellular membranes. These phospholipid alterations are also consistent with previous findings  
343 that identified Rim101 as a regulator of the PS decarboxylase (CNAG\_00834) in alkaline growth  
344 conditions [16]. Furthermore, the *rim101* $\Delta$  alkaline pH-sensitive mutant phenotype can be rescued  
345 with glycerol supplementation to the growth medium (Fig 6F). Glycerol is the backbone of all  
346 phospholipids, and its ability to suppress the severe alkaline growth defect of the *rim101* $\Delta$  mutant  
347 strain may be due to the re-establishment of normal plasma membrane phospholipid composition.  
348 We did not observe a similar trend or any significant differences in PE levels in the *rim101* $\Delta$  mutant  
349 strain (Table S2).

## 350 Discussion 351

### 352 ***Rra1* pH-induced internalization**

353 Endocytosis and protein trafficking from the cell surface allow cells to internalize signals  
354 and macromolecules from the extracellular space. Additionally, this process recycles membrane-  
355 bound proteins and surrounding lipids [35,36]. Clathrin-mediated endocytosis (CME) is the  
356 dominant endocytic pathway in organisms as diverse as mammalian neuronal cells to microbial  
357 pathogens. CME has been well-characterized for its role in intracellular communication [37,38],  
358 as well as for promoting cellular homeostasis through the internalization of membrane-associated  
359 proton pumps and ion channels [37]. CME is initiated by the recruitment of coat proteins and  
360 clathrin to membrane-bound receptor-ligand complexes that are targeted for internalization.  
361 These coated regions of the membrane invaginate to form endocytic vesicles, which are then



362 transported to intracellular micro-niches including the Endosomal Sorting Complex Required for  
363 Transport (ESCRT) (Conner and Schmid, 2003; Gonzá Lez-Gaitá N and Stenmark, 2003; Hurley  
364 and Emr, 2006; Miaczynska and Stenmark, 2008; Park *et al.*, 2020). Likely due to their  
365 involvement in the transport of internalized cellular material, ESCRT proteins are required for  
366 stress tolerance, including the adaptation of microbial pathogens to extracellular conditions  
367 encountered in the infected human host ([8,23,41–43]. In many fungi such as the human  
368 pathogens *C. albicans*, *A. fumigatus*, and *C. neoformans*, and the plant pathogen *Rhizoctonia*  
369 *solani*, this endocytosis process is required for growth and differentiation in response to changes  
370 in the extracellular environment [8,23,35,43–45]. Accordingly, disrupting protein trafficking  
371 pathways often results in defective fungal virulence [23,43].

372 Our studies suggest that the *C. neoformans* Rra1 protein is endocytosed in a pH- and  
373 clathrin-dependent manner (Fig 7). Furthermore, we have identified this internalization and  
374 subsequent enrichment at endomembranes as important for Rim pathway activation. pH-induced  
375 endocytosis of transmembrane transporter proteins has been well described in the model  
376 ascomycete *S. cerevisiae*. The transporters of inositol (Itr1), uracil (Fur4), tryptophan (Tat2), and  
377 hexose (Hxt6) are all endocytosed in response to increases in the bioavailability of their respective  
378 substrates. All of these endocytosis events also occur in response to ubiquitination [46].  
379 Endocytosis of Rim-associated proteins has also been explored in other fungi. The *S. cerevisiae*  
380 Rim21 protein in *S. cerevisiae* is endocytosed in a pH-dependent manner through a mechanism  
381 involving the ubiquitination of the Rim8 arrestin, whose homolog is notably absent from the *C.*  
382 *neoformans* genome [8,47,48]. Furthermore, the Rim21 protein in both *S. cerevisiae* and *C.*  
383 *albicans* colocalizes with ESCRT proteins, such as Snf7, in response to increases in extracellular  
384 pH. This interaction between ESCRT proteins and Rim pathway components is required for  
385 proteolytic activation of the Rim101 transcription factor [47,49,50].

386 pH-dependent endocytosis of pH-sensing proteins is not observed in every fungal  
387 organism with a Rim/Pal alkaline response pathway. In *A. nidulans*, studies have definitively



388 shown that Pal signaling and the response to increased pH do not require endocytosis. Using  
389 strains with mutations causing varying degrees of endocytosis impairment, the investigators  
390 demonstrated intact Rim signaling in these mutant backgrounds [51]. Furthermore, other studies  
391 revealed that upstream Pal and ESCRT components in *A. nidulans* localize to cortical plasma  
392 membrane puncta in alkaline conditions as opposed to endomembrane structures [52,53].  
393 Therefore, the endocytosis-independent activation of the transmembrane sensor in the *A.*  
394 *nidulans* pathway is distinct from the Rim21 sensor in the *S. cerevisiae* and *C. albicans* pathways.  
395 This distinction is especially interesting considering all of these sensors involve ubiquitination-  
396 dependent mechanisms of activation via their respective arrestin protein partners. This  
397 divergence could be explained by the unique way in which filamentous fungi traffic various  
398 proteins. Filamentous fungal membrane transporters can localize in a polar manner, whereas  
399 yeast membrane transporters generally localize homogeneously in microdomains throughout the  
400 plasma membrane [54]. This has been linked to a different path the protein takes following  
401 synthesis in the ER. Many of *A. nidulans* transporters bypass the Golgi apparatus and traffic  
402 directly to the plasma membrane following synthesis [54]. The ability for proteins to circumvent  
403 certain cellular components to a final destination could explain the endocytosis-independent  
404 mechanism of Pal pathway activation. The fact the *C. neoformans* Rra1 protein follows similar  
405 localization patterns and mechanisms of action as the other yeast-like fungi, but not the  
406 filamentous fungi, is compelling considering these proteins lack any sequence homology or  
407 evidence of common ancestry [8].

408

#### 409 ***Rra1 cycles back to the plasma membrane following activation***

410 We have observed that Rra1 returns to the plasma membrane following Rim pathway  
411 activation (Fig 7). It is hypothesized that the origin of retrograde sorting, specifically a Golgi-  
412 directed pathway originating from the endosome is the key sorting event that allows for plasma  
413 membrane recycling of a protein. Our protein interaction studies in the *C. neoformans* Rim

414 pathway in alkaline conditions support a Golgi origin of retrograde sorting for the Rra1 protein  
415 (Table 1 and (Ma and Burd, 2020)). These interaction studies also linked the Rra1 C-terminus  
416 and the Rim23 protein to clathrin and coatamer proteins in activating conditions.

417 In yeast, CME-directed internalization of endocytic vesicles is a continuous process,  
418 converting half of the material in the plasma membrane to the endosomal system every second  
419 [55]. Therefore, cycling of membrane-associated proteins is intimately linked to the plasma  
420 membrane. In *S. cerevisiae*, a protein that facilitates vesicle fusion at the cell surface, Snc1,  
421 normally recycles from the plasma membrane in a clathrin-dependent manner to the Golgi and  
422 then back out through the secretory pathway. However, when depleted from the PM, this protein  
423 accumulates in internal organelles [55]. This internal accumulation resembles the Rra1  
424 localization we observed in strains that have been either genetically altered or treated to disrupt  
425 plasma membrane composition. This supports our model of Rra1 cycling via clathrin-guided  
426 membrane invagination (Fig 7). Additionally, cycling of membrane proteins can be essential for  
427 pathway activation. In *S. cerevisiae*, the Cdc42 Rho-GTPase cycles between the membrane and  
428 the cytoplasm to regulate cell polarity [56]. This cycling-dependent activation is what we observe  
429 with alkaline pH-induced endocytosis of the Rra1 protein and subsequent Rim pathway activation,  
430 further supporting our model of Rra1 cycling (Fig 7).

431 Our results reveal that Rra1 cycling is dependent upon regions of the C-terminal tail and  
432 specific phosphorylation events. However, inhibition of this phosphorylation event does not affect  
433 growth at alkaline pH or Rim pathway activation despite notable alterations in Rra1 protein  
434 localization. PTMs of membrane-associated proteins and their effects on endocytosis and  
435 recycling are well supported in studies of model fungi. The *S. cerevisiae*  $\alpha$ -factor pheromone  
436 receptor, Ste2, is phosphorylated on the most distal serine/threonine residues on its C-terminal  
437 tail. Phosphomutation studies suggested that these residues are required for receptor-ligand  
438 sensitivity, revealing a regulatory role for this PTM. However, in subsequent truncation  
439 experiments, investigators demonstrated that removing the entire C-terminal tail of Ste2 resulted

440 in a severe morphogenesis defect [57,58]. This observation is similar to our analysis of the  
441 phosphorylation site (T317A) of the Rra1 C-terminus. Mutating this residue inhibits the ability for  
442 Rra1 to localize in the plasma membrane, but does not inhibit its function, whereas removing the  
443 entire C-terminus renders the protein nonfunctional and the pathway inactive [16].

444

#### 445 ***Rim signaling regulates plasma membrane dynamics and Rra1 cycling***

446 Although our experimental results support a model in which Rra1 localization in punctate  
447 structures at the cell surface is not necessary for activation, they also indicate an important link  
448 between the plasma membrane and *C. neoformans* Rim signaling. The question remains of why  
449 the *C. neoformans* Rra1 pH sensor localizes to the plasma membrane at low pH. Our previous  
450 work demonstrated that Rra1 functions similarly to the pH-sensing proteins in *S. cerevisiae* and  
451 *A. nidulans*. Specifically, these sensors use their C-terminal tails to sense changes in plasma  
452 membrane asymmetry and phospholipid distribution in order to efficiently responds to changes in  
453 extracellular pH [16,18,59–61]. Therefore, we suggest that the membrane localization of Rra1  
454 allows for its condition-dependent internalization through the dynamics between its cytoplasmic  
455 tail and the phospholipids in the membrane. However, it is the internalized localization of this  
456 protein that allows it to interact with its downstream effectors and activate the Rim alkaline  
457 response.

458 The results from the work presented here further support the connection between Rim  
459 signaling and membrane dynamics through detailed lipidomics of the wildtype and *rim101Δ*  
460 mutant strains. This connection is further supported through rescue studies showing suppression  
461 of the *rim101Δ* pH-sensitive mutant phenotype when the growth media is supplemented with  
462 glycerol, the backbone of phospholipids. The inner leaflet of the fungal plasma membrane is  
463 enriched for specific bulky phospholipids, like phosphatidylserine (PS), whereas endosomes and  
464 vacuoles are not [55]. Our results showing increases in the PS levels of the *rim101Δ* mutant strain  
465 compared to wildtype at high pH, could represent altered integrity of both plasma and endosomal

466 membranes and a disruption in the balance needed for proper protein cycling. The increased  
467 levels of PC also found in the *rim101* $\Delta$  mutant at high pH, also affect the ratio of membrane  
468 phospholipids, which might then affect protein trafficking throughout the cell. This altered  
469 membrane composition coupled with the results showing decreased ability for Rra1 to recycle  
470 back to the plasma membrane in the *rim101* $\Delta$  mutant, the T317A phosphomutant, and in  
471 conditions that affect overall membrane integrity support the dependence of Rra1 cycling on Rim-  
472 regulated membrane maintenance.

473         Additionally, it is known that Rim pathway outputs are involved in cell wall remodeling  
474 [3,5,9,16,62] and that specific membrane domain characteristics are dependent not only on lipid  
475 distribution and composition, but also on the proximity to the fungal cell wall [2,63]. Rim101  
476 regulation of the fungal cell wall at high pH could have direct effects on cell wall turgor pressure  
477 and therefore would affect the shape and curvature of the plasma membrane allowing for  
478 membrane-associated proteins to establish themselves in microdomains. Furthermore, the  
479 significant increases in unsaturated and cumbersome PC and PS lipid species in the *rim101* $\Delta$   
480 mutant strain might affect the formation of protein-localizing lipid rafts in the plasma membrane.  
481 These same species were significantly decreased in the wildtype strain in response to an increase  
482 in pH, further connecting the regulation of lipid ratios in the membrane, specifically proportions of  
483 unsaturated species, with the alkaline pH response.

484         The specific membrane microdomain localization of the *S. cerevisiae* pH sensors has  
485 been partially identified, and this identification might reveal insights regarding Rra1 membrane  
486 association. Previous investigators observed Rim21 localization as distinct from Membrane  
487 Compartment containing arginine permease Can1 (MCC) regions in the plasma membrane [64].  
488 This is an important discovery because MCC domains cannot also function as sites of endocytosis  
489 due to their bulky nature and the inability for endocytosis machinery to assemble around cargo  
490 [65]. It has also been determined that Rim21 localizes to portions of the membrane that are devoid  
491 of cortical ER, eliminating MCL microdomains (Sterol transporter regions) as potential resting

492 sites [66]. This is also an important distinction based on our previous studies that identified the  
493 sterol-mediated alkaline response as a Rim pathway-independent alkaline response process in  
494 *C. neoformans* [26].

495         We therefore conclude that these data support a model of alkaline pH-induced Rra1  
496 internalization and recycling that intimately involve Rim-dependent membrane modifications as  
497 graphically depicted in Fig 7. In response to an alkaline shift, the *C. neoformans* Rra1 pH sensor  
498 is endocytosed through invagination of the plasma membrane where it resides in specific  
499 microdomains (1). The Nap1 adaptor protein stabilizes the Rra1 protein during this invagination  
500 through interaction with its cytosolic C-terminal tail [17] (2). The Rra1 protein, including its C-  
501 terminus, undergoes a conformational change to enable internalization and movement away from  
502 the plasma membrane allowing Rra1 to interact with downstream effectors. Once endocytosed,  
503 a clathrin coat forms around the Rra1-containing vesicle and the ESCRT machinery is recruited  
504 (3). Upstream Rim pathway components and downstream effectors (Rim23, Rim20, and the  
505 Rim13 protease) are then recruited to the plasma membrane as previously described [8] (4). This  
506 movement initiates cleavage of the terminal component of the Rim pathway, the Rim101  
507 transcription factor (5a). Following cleavage, Rim101 translocates to the nucleus to aid in the  
508 transcription of virulence genes needed for growth of this fungus at alkaline pH, including genes  
509 involved in cell wall remodeling and membrane maintenance (5B). The clathrin-coated vesicle  
510 containing Rra1 is then coated with COPI and transported through the Golgi (6 & 7). This vesicle  
511 then sheds the COPI and clathrin coats and travels to the endoplasmic reticulum (ER) (8). When  
512 a decrease in pH is sensed, the Rra1 protein is then escorted from the ER (9) back through the  
513 Golgi where it is actively re-coated with COPII coatomer and clathrin (10). The vesicle containing  
514 Rra1 is then transported back up to the plasma membrane to regions rich in sphingolipids and  
515 sterols (i.e. lipid rafts) (12). Rra1 then remains poised in the plasma membrane awaiting a shift in  
516 extracellular pH. Overall, these data help us to understand the role of the Rra1 pH-sensing protein

517 in the Rim-dependent alkaline pH response and the mechanism by which it responds to  
518 extracellular stress in a relevant human fungal pathogen.  
519

520 **Table 1. Proteins enriched in Gfp-Rra1-Ct interactome at pH8 compared to untagged control.**  
521

| Gene ID                    | Gene name/predicted ortholog  | Peptide counts |
|----------------------------|-------------------------------|----------------|
| <a href="#">CNAG_01274</a> | Coatomer subunit gamma        | 8              |
| <a href="#">CNAG_03299</a> | Coatomer subunit beta         | 13             |
| <a href="#">CNAG_03554</a> | Coatomer subunit alpha        | 6              |
| <a href="#">CNAG_02937</a> | Hypothetical protein          | 5              |
| <a href="#">CNAG_04074</a> | Coatomer subunit beta'        | 28             |
| <a href="#">CNAG_01148</a> | Peptidyl prolyl isomerase     | 6              |
| <a href="#">CNAG_00058</a> | T-complex protein subunit     | 7              |
| <a href="#">CNAG_00447</a> | T-complex protein subunit     | 6              |
| <a href="#">CNAG_01019</a> | Cu superoxide dismutase       | 5              |
| <a href="#">CNAG_01568</a> | T-complex protein subunit     | 10             |
| <a href="#">CNAG_02038</a> | Hypothetical protein          | 9              |
| <a href="#">CNAG_02710</a> | T-complex protein subunit     | 14             |
| <a href="#">CNAG_03459</a> | T-complex protein subunit     | 12             |
| <a href="#">CNAG_04304</a> | T-complex protein subunit     | 21             |
| <a href="#">CNAG_05105</a> | translation initiation factor | 7              |
| <a href="#">CNAG_06600</a> | Vesicular protein Sec18       | 6              |
| <a href="#">CNAG_07347</a> | Heat shock protein            | 9              |
| <a href="#">CNAG_06508</a> | Glucan synthase Fks1          | 6              |
| <a href="#">CNAG_02091</a> | Nucleosome protein Nap1       | 19             |
| <a href="#">CNAG_04613</a> | ATP-dependent transporter     | 13             |
| <a href="#">CNAG_02753</a> | ER protein                    | 6              |
| <a href="#">CNAG_06630</a> | Membrane translocase Tim44    | 5              |

522 This subset of potential Rra1-Ct interactors is involved in intracellular protein transport. **GO-term cellular**  
523 **component**, **FunCat**, **both**.  
524  
525

526 **Table 2. Proteins enriched in Rim23-Gfp interactome at pH8 compared to untagged control.**  
527  
528

| Gene ID                    | Gene name/predicted ortholog | Peptide counts |
|----------------------------|------------------------------|----------------|
| <a href="#">CNAG_01274</a> | Coatomer subunit gamma       | 18             |
| <a href="#">CNAG_03299</a> | Coatomer subunit beta        | 26             |
| <a href="#">CNAG_03554</a> | Coatomer subunit alpha       | 48             |
| <a href="#">CNAG_01414</a> | ARCN1 protein                | 8              |
| <a href="#">CNAG_00988</a> | Importin subunit beta-1      | 33             |
| <a href="#">CNAG_02457</a> | Importin subunit beta-2      | 20             |
| <a href="#">CNAG_03317</a> | Clathrin protein Ap47        | 10             |
| <a href="#">CNAG_03418</a> | Crm1-F1                      | 13             |
| <a href="#">CNAG_03853</a> | COP11 GTPase Sar1            | 11             |
| <a href="#">CNAG_04074</a> | Coatomer subunit beta        | 20             |
| <a href="#">CNAG_04904</a> | Clathrin heavy chain 1       | 16             |
| <a href="#">CNAG_05884</a> | Importin subunit beta-4      | 20             |
| <a href="#">CNAG_06630</a> | Translocase subunit Tim44    | 13             |
| <a href="#">CNAG_07318</a> | Gamma-adaptin                | 6              |
| <a href="#">CNAG_07598</a> | Import-alpha receptor        | 7              |
| <a href="#">CNAG_01211</a> | Hypothetical protein         | 11             |
| <a href="#">CNAG_04194</a> | Protein transport Sec13      | 9              |
| <a href="#">CNAG_06600</a> | Protein transport Sec18      | 30             |
| <a href="#">CNAG_01837</a> | Vacuolar sorting Vps35       | 13             |

|            |                        |   |
|------------|------------------------|---|
| CNAG_06998 | Protein transporter    | 8 |
| CNAG_00539 | Membrane transport     | 7 |
| CNAG_01637 | CopII Vesicle Erv46    | 5 |
| CNAG_07570 | Snare protein Ykt6p    | 5 |
| CNAG_01426 | Vacuolar sorting Vps26 | 5 |

529  
530  
531  
532

This subset of potential Rim23 interactors is involved in intracellular protein transport. **GO-term cellular component**, FunCat, both



533 **Materials and Methods**

534

535 ***Strains, media, and growth conditions***

536 Strains generated and used in these studies are shown in Table 3. Each phosphomutant  
537 and fluorescently tagged strain was generated in either the *C. neoformans* H99 *MAT $\alpha$*  or the  
538 KN99 *MATa* genetic background. The *MATa* strain expressing Rra1-GFP (KMP81) was  
539 generated by a mating cross between the *MAT $\alpha$*  strain expressing Rra1-GFP (KS310) and the  
540 *MATa* wildtype strain (KN99) (Table 3). Spores were selected on YPD medium + NAT/NEO and  
541 the ability to mate with *MAT $\alpha$*  (H99). The *sre1 $\Delta$*  + Rra1-GFP *MATa* (HEB99) and *rim101 $\Delta$*  + Rra1-  
542 GFP *MATa* (HEB101) strains, were generated from a mating cross between KMP81 and the  
543 *sre1 $\Delta$ ::NEO* *MAT $\alpha$*  (HEB5) and *rim101 $\Delta$ ::NAT* *MAT $\alpha$*  (TOC35) strains, respectively (Table 3).  
544 Spores were selected for on YPD medium + NAT/NEO, the ability to mate with *MAT $\alpha$*  (H99), and  
545 pH-sensitivity.

546 To generate all phosphomutant strains containing the GFP-tagged Rra1, *pKS85* (*pHIS3*-  
547 *RRA1-GFP-NAT*) plasmid was subjected to site directed mutagenesis to generate mutant alleles  
548 for each predicted phosphosite (described in more detail below). These mutated plasmids, listed  
549 in Table 4, were then biolistically transformed into the *rra1 $\Delta$ ::NEO* (KS336) full knockout strain  
550 (Table 3).

551 Strains were incubated in either Yeast Peptone Dextrose media (YPD) (1% yeast extract,  
552 2% peptone, and 2% dextrose) or buffered media: YPD pH 4 and pH 8 media. Buffered media  
553 was made by adding 150 mM HEPES buffer to YPD, adjusting the pH with concentrated HCl (for  
554 pH 4) or NaOH (for pH 8.15), prior to autoclaving. 20% glucose was added to the media following  
555 sterilization and autoclaving. For YPD + glycerol plates, 0.4% glycerol was also added to the  
556 media following sterilization and autoclaving. For spot plate assays, strains were incubated  
557 overnight at 30°C with 150 rpm shaking in YPD, washed twice, resuspended in 1X PBS, and  
558 serially diluted onto selective media. Plates were then incubated at 30°C for 1-3 days and imaged.

559 Table 3. Strain List

| Strain | Genotype                                                                                       | Source      |
|--------|------------------------------------------------------------------------------------------------|-------------|
| H99    | <i>MAT<math>\alpha</math></i>                                                                  | [67]        |
| KN99a  | <i>MATa</i>                                                                                    | [68]        |
| KS336  | <i>rra1<math>\Delta</math>::NEO MAT<math>\alpha</math></i>                                     | [8]         |
| TOC35  | <i>rim101<math>\Delta</math>::NAT MAT<math>\alpha</math></i>                                   | [69]        |
| KS310  | <i>rra1<math>\Delta</math>::NEO + pKS85 (pHIS3-RRA1-GFP-NAT) MAT<math>\alpha</math></i>        | [16]        |
| KMP81  | <i>Rra1-GFP-NAT MATa</i>                                                                       | This study  |
| HEB101 | <i>rim101<math>\Delta</math>::NAT + Rra1-GFP-NAT MATa</i>                                      | This study. |
| KS338  | <i>rra1<math>\Delta</math>::NEO + pHIS3-RRA1-296T-GFP-NAT MAT<math>\alpha</math></i>           | [16]        |
| KS340  | <i>rra1<math>\Delta</math>::NEO + pHIS3-RRA1-273T-GFP-NAT MAT<math>\alpha</math></i>           | [16]        |
| KS234  | <i>H99 +pKS50 (pHIS3-GFP-RRA1 C-terminus) MAT<math>\alpha</math></i>                           | [16]        |
| KS336  | <i>rra1<math>\Delta</math>::NEO MAT<math>\alpha</math></i>                                     | [8]         |
| KS91   | <i>His-GFP-Rim101 MAT<math>\alpha</math></i>                                                   | [5]         |
| KS289  | <i>rim23<math>\Delta</math>::NEO + GFP-Rim23 + NAT MAT<math>\alpha</math></i>                  | [8]         |
| HEB5   | <i>sre1<math>\Delta</math>::NEO MAT<math>\alpha</math></i>                                     | [16]        |
| HEB99  | <i>sre1<math>\Delta</math>::NEO + Rra1-GFP-NAT MATa</i>                                        | This study. |
| KMP111 | <i>rra1<math>\Delta</math>::NEO + pKP37 (pHRR1-T317A-GFP-NAT) MAT<math>\alpha</math></i>       | This study. |
| KMP116 | <i>rra1<math>\Delta</math>::NEO + pKP34 (pHRR1-S329A-GFP-NAT) MAT<math>\alpha</math></i>       | This study. |
| KMP122 | <i>rra1<math>\Delta</math>::NEO + pKP32 (pHRR1-T352A-GFP-NAT) MAT<math>\alpha</math></i>       | This study. |
| KMP124 | <i>rra1<math>\Delta</math>::NEO + pKP35 (pHRR1-S580A/S584A-GFP-NAT) MAT<math>\alpha</math></i> | This study. |

560  
561

Table 4. Plasmid List

| Plasmid      | Open Reading Frame         | Backbone | Reference  |
|--------------|----------------------------|----------|------------|
| <i>pKP37</i> | <i>pHRR1-GFP-NAT T317A</i> | pHNAT    | This study |

|              |                                   |       |            |
|--------------|-----------------------------------|-------|------------|
| <i>pKP34</i> | <i>pHRRA1-GFP-NAT T329A</i>       | pHNAT | This study |
| <i>pKP32</i> | <i>pHRRA1-GFP-NAT T352A</i>       | pHNAT | This study |
| <i>pKP35</i> | <i>pHRRA1-GFP-NAT S580A/S584A</i> | pHNAT | This study |
| <i>pKS85</i> | <i>pHIS3-RRA1-GFP-NAT</i>         | pHNAT | This study |

562

### 563 **Microscopy**

564 To analyze Rra1-GFP localization in various backgrounds, strains were incubated at 30°C for 18h  
565 with 150 rpm shaking in YPD. Cells were then pelleted and resuspended in either pH 4 or pH 8  
566 Synthetic Complete media buffered with Mcllvaine's buffer [8]. For the FM4-64 (5 µg/µl;  
567 Invitrogen) colocalization studies, strains were grown overnight and shaken at 150 rpm and 30°C  
568 in YPD. Cells were pelleted, washed with PBS, and resuspended in 1 mL Mcllvaine's buffer pH  
569 8. 1 µl of FM4-64 stock solution was added to cell suspension and cells were incubated on ice for  
570 10 minutes and 20 minutes and imaged. Fluorescent images were captured using a Zeiss Axio  
571 Imager A1 fluorescence microscope equipped with an Axio-Cam MRM digital camera. Images  
572 were created using ImageJ software (Fiji) [70].

573 For Rra1 cycling microscopy, strains were incubated at 30°C with for 18h with 150 rpm  
574 shaking in YPD. Cells were then pelleted and resuspended in either pH 4 or pH 8 Synthetic  
575 Complete media buffered with Mcllvaine's buffer. Cells were then incubated for 60 minutes  
576 shaking at 30°C with shaking at 150 rpm. These cells were then pelleted, lightly resuspended,  
577 and imaged. Fluorescent images were captured as before. The cells that were grown in pH 8  
578 Mcllvaine's buffer were re-pelleted and resuspended in pH 4 buffer and incubated for 30 minutes  
579 shaking at 30°C with 150 rpm. These cells were then pelleted, lightly resuspended, and imaged  
580 and are represented by the pH 8 to pH 4 images. Rra1-GFP localization studies in both the *sre1Δ*  
581 and T317A phosphomutant backgrounds was also performed using the same incubations (60  
582 minutes in initial pH condition). For Rra1 cycling in the T317A phosphomutant background (Fig  
583 S3A), the same experiment was done but with shorter pre-incubations (30 minutes) in each  
584 extreme in order to see subtle phenotypes. Quantification of puncta per cell (2+) was done using

585 ImageJ Software (Fiji) software [70] and a blinded identification of cells with membrane associated  
586 puncta in each condition as previously described [16]. Approximately 600 cells per condition/strain  
587 were analyzed. For Rra1 localization and cycling in the *rim101* $\Delta$  and *sre1* $\Delta$  mutant backgrounds,  
588 the Rra1-GFP *MATa* strain (KMP81) was used as the positive control. For Rra1 localization and  
589 cycling in the phosphomutant backgrounds, the Rra1-GFP *MAT $\alpha$*  strain (KS310) was used.

590 For Rra1-GFP (KS310) and GFP-Rim101 (KS91) localization with Pitstop-2 (Sigma)  
591 treatment experiments, strains were incubated in YPD at 30°C for 18h with 150 rpm shaking.  
592 Cells were then pelleted and resuspended in either pH 4 or pH 8 McIlvaine's buffer for 10 minutes  
593 following treatment with 20  $\mu$ M Pitstop-2 (Rra1-GFP experiment) or both 20 and 42  $\mu$ M Pitstop-2  
594 (eGFP-Rim101 experiment) or vehicle control (DMSO). Cells were treated and incubated at 37°C  
595 with shaking at 150 rpm. For Rra1 localization, the mean values and standard errors of cells with  
596 clear endomembrane localization at pH 8 was quantified using ImageJ software (Fiji) (~600  
597 cells/condition; 4 biological replicates). Quantification graphs and statistics using a student's t-test  
598 were generated in GraphPad Prism (GraphPad Prism version 8.00 for Mac, GraphPad Software,  
599 San Diego California USA, [www.graphpad.com](http://www.graphpad.com)). For Rim101 localization, the mean values and  
600 standard errors of cells with clear nuclear localization at either pH in increasing amounts of drug  
601 were quantified using Fiji (~600 cells/condition; 3 biological replicates). GraphPad Prism software  
602 was used to generate the graph and the One-way ANOVA, Tukey's multiple comparison statistical  
603 analyses.

604

### 605 ***Drug Susceptibility Tests***

606 Pitstop-2 treatment experiments to determine susceptibility of wildtype *C. neoformans*  
607 (H99) cells to this treatment at varying pH was performed by broth microdilution. Specifically, cells  
608 were incubated at 30°C for 18h with 150 rpm shaking in YPD. Pistop-2 resuspended in DMSO  
609 was serially diluted in Synthetic Complete media buffered to pH 6.6, 6.8, 7, 7.2, or 7.4 with

610 McIlvaine's buffer. Fungal cells were then normalized and diluted in Synthetic Complete media  
611 buffered to the same pH values and added to the corresponding pH well containing Pitstop-2.  
612 Plates were incubated at 30°C for 72 hours, and the MIC was determined to be the lowest  
613 concentration of drug that led to no fungal cell growth.

614 Filipin III treatment experiments were carried out similarly. Wildtype cells (H99) were  
615 treated with increasing concentrations of Filipin III, which had been serially diluted in Synthetic  
616 Complete media buffered to pH 4, 5, 6, 7, and 8. Fungal cells were, again, normalized and diluted  
617 in the same media and added to wells containing Filipin III. Plates were incubated at 30°C for 48  
618 hours, and the MIC was determined to be the lowest concentration of drug that led to no fungal  
619 cell growth.

620

#### 621 ***Protein Extraction, Immunoprecipitation, and Western Blot***

622 Protein extracts for the protein interaction studies were prepared as in a similar manner to  
623 that previously described [8,16,17]. Briefly, the wildtype (H99 untagged strain), the GFP-Rim23  
624 (KS289), and the GFP-Rra1-Ct (KS234) strains were incubated at 30 °C for 18h with 150 rpm  
625 shaking in YPD pH 4. Cells were then pelleted and resuspended in either pH 4 again or switched  
626 to YPD pH 8. These cells were incubated for 1 hour and immediately pelleted and flash frozen.  
627 Cells were then lysed using 0.4 mL lysis buffer containing 2x protease inhibitors (Complete, Mini,  
628 EDTA-free; Roche), 1x phosphatase inhibitors (PhosStop; Roche) and 1 mM  
629 phenylmethanesulfonyl-fluoride (PMSF). Lysis was performed by bead beating (0.5 mL of 3 µM  
630 glass beads in a Mini- BeadBeater-16 (BioSpec), 6 cycles of 30 seconds each with a one-minute  
631 ice incubation between bead-beating cycle). Supernatants were transferred to new tubes and  
632 washed 3 times with 0.4 mL of lysis buffer. The crude pellet was then pelleted through  
633 centrifugation at 15,000 rpm, 4 °C, for 5 minutes, and the supernatant (cell lysate) was transferred  
634 to a new tube and further ultracentrifuged at 100,000 x g. Proteins were immunoprecipitated by

635 the addition of 50  $\mu$ l pre-equilibrated GFP-Trap resin (Chromotek) and inverted for 2 hours at 4  
636  $^{\circ}$ C. Mass spectrometry experiments were performed at an  $n$  of 1 by the Duke Proteomics Core  
637 Facility as previously described [17].

638 For Rra1-GFP protein gels and western blot analysis, the same experimental procedure  
639 as above was performed, but with some modifications. Briefly, the Rra1-GFP (KS310), the Rra1-  
640 GFP 296T truncation mutant (KS336) and the Rra1-GFP T317A phosphomutant (KMP111) were  
641 grown at 30  $^{\circ}$ C for 18h with 150 rpm shaking in YPD pH 4. Cells were then pelleted and  
642 resuspended in YPD pH 8 and incubated for 1.5 hours prior to lysis and protein extraction as  
643 outlined above. These lysates were not subjected to GFP-Trap pull down, instead whole cell  
644 lysate protein concentrations were measured using bicinchoninic acid assay (BCA) and protein  
645 samples were normalized and diluted in 4X NuPage lithium dodecyl sulfate (LDS) loading buffer  
646 and 10X NuPage Reducing Agent to a 1X concentration and boiled at 100 $^{\circ}$ C for 5 mins. Western  
647 blots were performed as described previously using a 4-12% NuPage BisTris gel. To probe and  
648 detect Rra1-GFP, immunoblots were incubated in anti-GFP primary antibody (using a 1/10,000  
649 dilution, Roche) and then in secondary anti-mouse peroxidase-conjugated secondary antibody  
650 (using a 1/25,000 dilution, Jackson Labs). Proteins were detected by enhanced  
651 chemiluminescence (ECL Prime Western blotting detection reagent; GE Healthcare).

652

### 653 ***GO term analysis (FungiFun, FunCat, and Cellular Compartment GO)***

654 The interactomes of the GFP-Rra1-Ct (KS234) and GFP-Rim23 (KS289) (extracted and  
655 analyzed as above) were run through FungiFun software to determine significantly enriched Gene  
656 Ontology (GO) categories [24]. The interactomes of these proteins at pH 8 were compared to that  
657 of the non-tagged wildtype control in the same condition and interactors with at least 5 exclusive  
658 peptides that were only present in the GFP-tagged sample were prioritized. This prioritization  
659 excluded potential false-positive interactions. Through the FungiFun program, the interactomes

660 were analyzed by Functat to observe general categories and cellular processes that are enriched  
661 in these data sets using the following parameters: hypergeometric distribution, p-value of 0.05,  
662 overrepresentation (enrichment), Benjamini-Hochberg procedure, and directly annotated  
663 associations. These data were also run through GO-term analysis looking specifically at cellular  
664 compartments to observe specific cellular locations that are significantly represented in these  
665 interactomes. The cellular component analysis was run using the same parameters. The specific  
666 CNAG #s and gene names in each category are in Tables 1 and 2, and the full interactomes are  
667 in Table S1.

668

### 669 ***Phosphoproteomics***

670 Protein for the phosphoproteomics experiment was harvested from cells prepared as described  
671 above for the protein interaction studies. Cells from the KS310 strain expressing Rra1-GFP were  
672 lysed also as described above, but with the addition of 1X PhosStop phosphatase inhibitor  
673 (Roche). After lysis, crude lysates were cleared at 5000 rpm for 10 minutes. Protein was then  
674 normalized such that immunoprecipitation was performed on 5 mg of protein per sample.  
675 Immunoprecipitation was performed as described above. Samples were submitted to the Duke  
676 University Proteomics core. For Rra1-GFP samples, samples were divided and part treated as  
677 described above for mass spectrometry, and part subjected to TiO<sub>2</sub> enrichment of  
678 phosphopeptides after digestion and before mass spectrometry.

679

### 680 ***Site-directed mutagenesis/Phosphomutant generation***

681 To create the non-phosphorylated site mutants, the *pHRR1-GFP* (pKS85) (Table 4)  
682 plasmid was PCR-amplified with Phusion HF Polymerase (NEB), using primers designed using  
683 the QuikChange Primer Design tool (Agilent). Site-directed mutagenesis primers can be found in  
684 Table 5. PCR products were PCR purified using the DNA Clean and Concentrator kit (Zymo  
685 Research), then transformed into One Shot TOP10 competent cells (ThermoFisher Scientific).



686 Each mutant construct was sequenced to ensure that no unintended mutations were introduced,  
 687 and subsequently transformed into the *rra1* $\Delta$  mutant strain (KS336). Using quantitative real time-  
 688 PCR, we identified and prioritized transformants in which each allele was expressed at levels  
 689 similar to the *RRA1-GFP* control *RRA1* primers listed in Table 5.

690 Table 5. Primer List

| Phosphomutant Cloning Constructs |                                                   |                            |
|----------------------------------|---------------------------------------------------|----------------------------|
| Primer                           | Primer Sequence                                   | Primer Description         |
| AA5292                           | TTAGATGCGAGGAAACGCGCAAA<br>TTCATTTGCAGGTC         | T317A F                    |
| AA5293                           | GACCTGCAAATGAATTTGCGCGTT<br>TCCTCGCATCTAA         | T317A R                    |
| AA5294                           | TCTAGCAGATGGGTTTACTGCAGG<br>TGTTACTTCTATCC        | S329A F                    |
| AA5295                           | GGATAGAAGTAACACCTGCAGTA<br>AACCCATCTGCTAGA        | S329A R                    |
| AA5296                           | GACGAGGAGGTCCGCGGCGGATGAAGG                       | T352A F                    |
| AA5297                           | CCTTCATCCGCCGCGGACCTCCTCGTC                       | T352A R                    |
| AA5298                           | GGAATAGAAGAGAACAGGCTGGG<br>AGAGAAGCTGGTGGGGAGACGG | S580A/ S584A F             |
| AA5299                           | CCGTCTCCCCACCAGCTTCTCTCCC<br>AGCCTGTTCTTCTTATTCC  | S580A/ S584A R             |
| Realtime primers                 |                                                   |                            |
| AA301                            | AGTATGACTCCACACATGGTCG                            | <i>GPD1</i> forward primer |
| AA302                            | AGACAAACATCGGAGCATCAGC                            | <i>GPD1</i> reverse primer |
| AA5068                           | TTACCCTATGAGCGGTGGTG                              | <i>CIG1</i> forward primer |
| AA5069                           | CTCCATCAAGCTGGTAGATG                              | <i>CIG1</i> reverse primer |
| AA4296                           | TGTAGGCTGGGGATTAGGAA                              | <i>RRA1</i> forward primer |
| AA4297                           | TGCTTCCCTTTTCCCTTTT                               | <i>RRA1</i> reverse primer |

691

692 **RNA Extraction and Quantitative Real Time PCR**

693 qRT-PCR was performed on the T317A phosphomutant as previously described [16].  
 694 Briefly, three biological replicates of wildtype (H99), *rra1* $\Delta$  (KS336), *rra1* $\Delta$  +Rra1-GFP (KS310),  
 695 and *rra1* $\Delta$  + Rra1-GFP T317A (KMP111) were prepped and RNA-extracted. Strains were  
 696 incubated overnight at 30 °C for 18h with 150 rpm shaking in YPD media. Cells were pelleted and



697 resuspended in YPD pH 8 media and incubated for 1.5 hours at 30 °C with 150 rpm shaking.  
698 Cells were then pelleted, flash frozen on dry ice, and lyophilized overnight. RNA was extracted  
699 by using the Qiagen RNeasy Plant Minikit with on column DNase digestion (Qiagen, Valencia,  
700 CA). cDNA was prepped by reverse-transcriptase PCR using the AffinityScript cDNA QPCR  
701 Synthesis kit (Agilent Technologies). qRT-PCR reactions were performed as previously described  
702 [16,71] using *RRA1* and *CIG1* primers listed in Table 5.

703

#### 704 ***Lipidomics Analysis***

705 The lipid extraction was performed as described in [72]. Briefly, *C. neoformans* strains  
706 were grown in minimal media (100 mM HEPES, 0.67 % YNB without amino acids, 2 % glucose,  
707 pH 4 or 8) at 30 °C for 48h under agitation. Cell suspensions were centrifuged at 1,734 g for 10  
708 minutes, the supernatant was removed, and pellet was washed twice with milliQ water. Cultures  
709 were counted in a hemocytometer and  $5 \times 10^8$  cells per sample were transferred to a glass tube.  
710 The suspensions were centrifuged again, and supernatant was removed. Then, each sample was  
711 suspended in 1.5 ml of Mandala buffer and vortexed vigorously for 20 seconds. The extraction  
712 was performed as described in [73], followed by Bligh and Dyer extraction [74]. A quarter of each  
713 sample obtained from the Bligh and Dyer Extraction was reserved for inorganic phosphate (Pi)  
714 determination, so the relative phospholipid signal was normalized by the Pi abundance. The  
715 organic phase was transferred to a new tube, dried and used for MS analysis.

716

717 **Acknowledgements**

718 We acknowledge the Duke Proteomics Shared Resource for their assistance with the  
719 various projects in this study. We acknowledge and thank Sandra Breeding for her assistance  
720 with media and reagents. Finally, we acknowledge our NIH funding (R01 AI074677,  
721 1F31A140427-01A1, P01 AI104533, to JAA and R01225770 to MDP) that made these studies  
722 possible. Dr. Del Poeta is a co-founder and chief scientific officer of MicroRid Technologies Inc.  
723 All authors have no relevant conflicts of interest.

724

725 **Author Contributions**

726 HEB, CMF, KMP, MDP, and JAA were involved with the conception and design of  
727 experiments and the writing process. HEB, KMP, CMF, and KM were involved in the acquisition  
728 of the data. All authors participated in the analysis and interpretation of the data.

729

730

731

## 732 References

- 733 1. Brakhage AA, Spröte P, Al-Abdallah Q, Gehrke A, Plattner H, Tüncher A. Regulation of  
734 penicillin biosynthesis in filamentous fungi. *Advances in biochemical*  
735 *engineering/biotechnology*. *Adv Biochem Eng Biotechnol*; 2004. pp. 45–90.  
736 doi:10.1007/b99257
- 737 2. Athanasopoulos A, André B, Sophianopoulou V, Gournas C. Fungal plasma membrane  
738 domains. *FEMS Microbiology Reviews*. Oxford University Press; 2019. pp. 642–673.  
739 doi:10.1093/femsre/fuz022
- 740 3. Mira NP, Lourenço AB, Fernandes AR, Becker JD, Sãl-Correia I. The RIM101 pathway  
741 has a role in *Saccharomyces cerevisiae* adaptive response and resistance to propionic  
742 acid and other weak acids. *FEMS Yeast Res*. 2009;9: 202–216. doi:10.1111/j.1567-  
743 1364.2008.00473.x
- 744 4. O'Meara TR, Holmer SM, Selvig K, Dietrich F, Alspaugh JA. *Cryptococcus neoformans*  
745 Rim101 is associated with cell wall remodeling and evasion of the host immune  
746 responses. *MBio*. 2013;4. doi:10.1128/mBio.00522-12
- 747 5. O'Meara TR, Xu W, Selvig KM, O'Meara MJ, Mitchell AP, Alspaugh JA. The  
748 *Cryptococcus neoformans* Rim101 transcription factor directly regulates genes required  
749 for adaptation to the host. *Mol Cell Biol*. 2014;34: 673–84. doi:10.1128/MCB.01359-13
- 750 6. Sherrington SL, Sorsby E, Mahtey N, Kumwenda P, Lenardon MD, Brown I, et al.  
751 Adaptation of *Candida albicans* to environmental pH induces cell wall remodelling and  
752 enhances innate immune recognition. Noverr MC, editor. *PLOS Pathog*. 2017;13:  
753 e1006403. doi:10.1371/journal.ppat.1006403
- 754 7. Cornet M, Gaillardin C. pH signaling in human fungal pathogens: a new target for  
755 antifungal strategies. *Eukaryot Cell*. 2014;13: 342–52. doi:10.1128/EC.00313-13
- 756 8. Ost KS, O'Meara TR, Huda N, Esher SK, Alspaugh JA. The *Cryptococcus neoformans*  
757 Alkaline Response Pathway: Identification of a Novel Rim Pathway Activator. *PLoS*  
758 *Genet*. 2015;11. doi:10.1371/journal.pgen.1005159
- 759 9. Ost KS, Esher SK, Leopold Wager CM, Walker L, Wagener J, Munro C, et al. Rim  
760 Pathway-Mediated Alterations in the Fungal Cell Wall Influence Immune Recognition and  
761 Inflammation. *MBio*. 2017;8: e02290-16. doi:10.1128/mBio.02290-16
- 762 10. Hommel B, Mukaremera L, Cordero RJB, Coelho C, Desjardins CA, Sturny-Leclère A, et  
763 al. Titan cells formation in *Cryptococcus neoformans* is finely tuned by environmental  
764 conditions and modulated by positive and negative genetic regulators. *PLoS Pathog*.  
765 2018;14: e1006982. doi:10.1371/journal.ppat.1006982
- 766 11. Selvig K, Alspaugh JA. pH Response Pathways in Fungi: Adapting to Host-derived and  
767 Environmental Signals. *Mycobiology*. 2011;39: 249–56.  
768 doi:10.5941/MYCO.2011.39.4.249
- 769 12. Bertuzzi M, Schrettl M, Alcazar-Fuoli L, Cairns TC, Muñoz A, Walker LA, et al. The pH-  
770 responsive PacC transcription factor of *Aspergillus fumigatus* governs epithelial entry and  
771 tissue invasion during pulmonary aspergillosis. *PLoS Pathog*. 2014;10: e1004413.  
772 doi:10.1371/journal.ppat.1004413
- 773 13. Davis D, Edwards JE, Mitchell AP, Ibrahim AS. *Candida albicans* RIM101 pH response  
774 pathway is required for host-pathogen interactions. *Infect Immun*. 2000;68: 5953–9.  
775 Available: <http://www.ncbi.nlm.nih.gov/pubmed/10992507>
- 776 14. Antonio C-CJ, Lucila O-C, Miriam T-S, Scott G, José R-H. Functional analysis of the pH  
777 responsive pathway Pal/Rim in the phytopathogenic basidiomycete *Ustilago maydis*.  
778 *Fungal Genet Biol*. 2010;47. doi:10.1016/j.fgb.2010.02.004
- 779 15. Rajasingham R, Smith RM, Park BJ, Jarvis JN, Govender NP, Chiller TM, et al. Global  
780 burden of disease of HIV-associated cryptococcal meningitis: an updated analysis.  
781 *Lancet Infect Dis*. 2017;17: 873–881. doi:10.1016/S1473-3099(17)30243-8
- 782 16. Brown HE, Ost KS, Esher SK, Pianalto KM, Saelens JW, Guan Z, et al. Identifying a

- 783 Novel Connection Between the Fungal Plasma Membrane and pH-Sensing. *Mol*  
784 *Microbiol.* 2018 [cited 10 Jul 2018]. doi:10.1111/mmi.13998
- 785 17. Pianalto KM, Ost KS, Brown HE, Alspaugh JA. Characterization of additional components  
786 of the environmental pH-sensing complex in the pathogenic fungus *Cryptococcus*  
787 *neoformans*. *J Biol Chem.* 2018;293: 9995–10008. doi:10.1074/jbc.RA118.002741
- 788 18. Nishino K, Obara K, Kihara A. The C-terminal Cytosolic Region of Rim21 Senses  
789 Alterations in Plasma Membrane Lipid Composition: Insights into sensing mechanisms for  
790 plasma membrane lipid asymmetry. *J Biol Chem.* 2015;290: 30797–805.  
791 doi:10.1074/jbc.M115.674382
- 792 19. Fernandes CM, Goldman GH, Del Poeta M. Biological Roles Played by Sphingolipids in  
793 Dimorphic and Filamentous Fungi. 2018. Available: <http://mbio.asm.org/>
- 794 20. Munshi MA, Gardin JM, Singh A, Luberto C, Rieger R, Bouklas T, et al. The Role of  
795 Ceramide Synthases in the Pathogenicity of *Cryptococcus neoformans*. *Cell Rep.*  
796 2018;22: 1392–1400. doi:10.1016/j.celrep.2018.01.035
- 797 21. Luberto C, Toffaletti DL, Wills EA, Tucker SC, Casadevall A, Perfect JR, et al. Roles for  
798 inositol-phosphoryl ceramide synthase 1 (IPC1) in pathogenesis of *C. neoformans*.  
799 *Genes Dev.* 2001;15: 201–12. doi:10.1101/gad.856001
- 800 22. Lev S, Rupasinghe T, Desmarini D, Kaufman-Francis K, Sorrell TC, Roessner U, et al.  
801 The PHO signaling pathway directs lipid remodeling in *Cryptococcus neoformans* via  
802 DGTS synthase to recycle phosphate during phosphate deficiency. Bahn Y-S, editor.  
803 *PLoS One.* 2019;14: e0212651. doi:10.1371/journal.pone.0212651
- 804 23. Hu G, Caza M, Cadieux B, Chan V, Liu V, Kronstad J. *Cryptococcus neoformans* requires  
805 the ESCRT protein Vps23 for iron acquisition from heme, for capsule formation, and for  
806 virulence. *Infect Immun.* 2013;81: 292–302. doi:10.1128/IAI.01037-12
- 807 24. Priebe S, Kreisel C, Horn F, Guthke R, Linde J. FungiFun2: A comprehensive online  
808 resource for systematic analysis of gene lists from fungal species. *Bioinformatics.*  
809 2015;31: 445–446. doi:10.1093/bioinformatics/btu627
- 810 25. Telzrow CL, Nichols CB, Castro-Lopez N, Wormley FL, Alspaugh JA. A fungal arrestin  
811 protein contributes to cell cycle progression and pathogenesis. *MBio.* 2019;10.  
812 doi:10.1128/mBio.02682-19
- 813 26. Brown HE, Telzrow CL, Saelens JW, Fernandes L, Alspaugh JA. Sterol-Response  
814 Pathways Mediate Alkaline Survival in Diverse Fungi. *MBio.* 2020;11.  
815 doi:10.1128/mBio.00719-20
- 816 27. Chung D, Barker BM, Carey CC, Merriman B, Werner ER, Lechner BE, et al. ChIP-seq  
817 and In Vivo Transcriptome Analyses of the *Aspergillus fumigatus* SREBP SrbA Reveals a  
818 New Regulator of the Fungal Hypoxia Response and Virulence. Doering TL, editor. *PLoS*  
819 *Pathog.* 2014;10: e1004487. doi:10.1371/journal.ppat.1004487
- 820 28. Bien CM, Chang YC, Nes WD, Kwon-Chung KJ, Espenshade PJ. *Cryptococcus*  
821 *neoformans* Site-2 protease is required for virulence and survival in the presence of azole  
822 drugs. *Mol Microbiol.* 2009;74: 672–690. doi:10.1111/j.1365-2958.2009.06895.x
- 823 29. Chang YC, Ingavale SS, Bien C, Espenshade P, Kwon-Chung KJ. Conservation of the  
824 sterol regulatory element-binding protein pathway and its pathobiological importance in  
825 *Cryptococcus neoformans*. *Eukaryot Cell.* 2009;8: 1770–9. doi:10.1128/EC.00207-09
- 826 30. Yang J, Zhang Y. I-TASSER server: New development for protein structure and function  
827 predictions. *Nucleic Acids Res.* 2015;43: W174–W181. doi:10.1093/nar/gkv342
- 828 31. Yang J, Yan R, Roy A, Xu D, Poisson J, Zhang Y. The I-TASSER suite: Protein structure  
829 and function prediction. *Nature Methods.* Nature Publishing Group; 2014. pp. 7–8.  
830 doi:10.1038/nmeth.3213
- 831 32. Roy A, Kucukural A, Zhang Y. I-TASSER: A unified platform for automated protein  
832 structure and function prediction. *Nat Protoc.* 2010;5: 725–738. doi:10.1038/nprot.2010.5
- 833 33. Garner E RPDABC and OZ. Predicting binding regions within disordered proteins.

- 834 Genome Informatics. 1999;10: 41–50. Available: <http://www.pondr.com/pondr-tut5.html>  
835 34. Dunker AK, Lawson JD, Brown CJ, Williams RM, Romero P, Oh JS, et al. Intrinsically  
836 disordered protein. *J Mol Graph Model*. 2001;19: 26–59. doi:10.1016/S1093-  
837 3263(00)00138-8  
838 35. Epp E, Nazarova E, Regan H, Douglas LM, Konopka JB, Vogel J, et al. Clathrin- and  
839 arp2/3-independent endocytosis in the fungal pathogen *Candida albicans*. *MBio*. 2013;4.  
840 doi:10.1128/mBio.00476-13  
841 36. De Duve C. The origin of eukaryotes: A reappraisal. *Nature Reviews Genetics*. Nature  
842 Publishing Group; 2007. pp. 395–403. doi:10.1038/nrg2071  
843 37. Conner SD, Schmid SL. Regulated portals of entry into the cell. *Nature*. Nature  
844 Publishing Group; 2003. pp. 37–44. doi:10.1038/nature01451  
845 38. Miaczynska M, Stenmark H. Mechanisms and functions of endocytosis. *Journal of Cell*  
846 *Biology*. The Rockefeller University Press; 2008. pp. 7–11. doi:10.1083/jcb.200711073  
847 39. González Lez-Gaitá N M, Stenmark H. Endocytosis and Signaling: A Relationship under  
848 Development. *Cell*. 2003.  
849 40. Park Y-D, Chen SH, Camacho E, Casadevall A, Williamson PR. Role of the ESCRT  
850 Pathway in Laccase Trafficking and Virulence of *Cryptococcus neoformans*. 2020 [cited 6  
851 Aug 2020]. doi:10.1128/IAI.00954-19  
852 41. Hurley JH, Emr SD. The ESCRT complexes: Structure and mechanism of a membrane-  
853 trafficking network. *Annual Review of Biophysics and Biomolecular Structure*. NIH Public  
854 Access; 2006. pp. 277–298. doi:10.1146/annurev.biophys.35.040405.102126  
855 42. Weissman Z, Shemer R, Conibear E, Kornitzer D. An endocytic mechanism for  
856 haemoglobin-iron acquisition in *Candida albicans*. *Mol Microbiol*. 2008;69: 201–217.  
857 doi:10.1111/j.1365-2958.2008.06277.x  
858 43. Park Y-D, Hui Chen S, Camacho E, Casadevall A. Role of the ESCRT pathway in  
859 Laccase Trafficking and Virulence of *Cryptococcus neoformans*. 2020 [cited 21 Apr  
860 2020]. doi:10.1128/IAI.00954-19  
861 44. Kamzolkina V V, Kiselica MA, Kudryavtseva OA, Shtaer O V, Mazheika IS. Endocytosis  
862 and Its Inhibitors in Basidiomycetous Fungus *Rhizoctonia solani*. *Seriya*. 2017;72: 149–  
863 157. doi:10.3103/S0096392517030063  
864 45. Wang P, Shen G. The endocytic adaptor proteins of pathogenic fungi: Charting new and  
865 familiar pathways. *Medical Mycology*. NIH Public Access; 2011. pp. 449–457.  
866 doi:10.3109/13693786.2011.553246  
867 46. Nikko E, Pelham HRB. Arrestin-mediated endocytosis of yeast plasma membrane  
868 transporters. *Traffic*. 2009;10: 1856–1867. doi:10.1111/j.1600-0854.2009.00990.x  
869 47. Barwell KJ, Boysen JH, Xu W, Mitchell AP. Relationship of DFG16 to the Rim101p pH  
870 response pathway in *Saccharomyces cerevisiae* and *Candida albicans*. *Eukaryot Cell*.  
871 2005;4: 890–899. doi:10.1128/EC.4.5.890-899.2005  
872 48. Maeda T. The signaling mechanism of ambient pH sensing and adaptation in yeast and  
873 fungi. *FEBS J*. 2012;279: 1407–1413. doi:10.1111/j.1742-4658.2012.08548.x  
874 49. Xu W, Smith FJ, Subaran R, Mitchell AP. Multivesicular body-ESCRT components  
875 function in pH response regulation in *Saccharomyces cerevisiae* and *Candida albicans*.  
876 *Mol Biol Cell*. 2004;15: 5528–5537. doi:10.1091/mbc.E04-08-0666  
877 50. Boysen JH, Mitchell AP. Control of Bro1-domain protein Rim20 localization by external  
878 pH, ESCRT machinery, and the *Saccharomyces cerevisiae* Rim101 pathway. *Mol Biol*  
879 *Cell*. 2006;17: 1344–1353. doi:10.1091/mbc.E05-10-0949  
880 51. Lucena-Agell D, Galindo A, Arst HN, Peñalva MA. *Aspergillus nidulans* ambient pH  
881 signaling does not require endocytosis. *Eukaryot Cell*. 2015;14: 545–553.  
882 doi:10.1128/EC.00031-15  
883 52. Galindo A, Hervás-Aguilar A, Rodríguez-Galán O, Vincent O, Arst HN, Tilburn J, et al.  
884 PalC, one of two Bro1 domain proteins in the fungal pH signalling pathway, localizes to



- 885 cortical structures and binds Vps32. *Traffic*. 2007;8: 1346–1364. doi:10.1111/j.1600-  
886 0854.2007.00620.x
- 887 53. Galindo A, Calcagno-Pizarelli AM, Arst HN, Peñalva MÁ. An ordered pathway for the  
888 assembly of fungal ESCRT-containing ambient pH signalling complexes at the plasma  
889 membrane. *J Cell Sci*. 2012;125: 1784–1795. doi:10.1242/jcs.098897
- 890 54. Dimou S, Diallinas G. Life and Death of Fungal Transporters under the Challenge of  
891 Polarity. *International journal of molecular sciences*. NLM (Medline); 2020. p. 5376.  
892 doi:10.3390/ijms21155376
- 893 55. Ma M, Burd CG. Retrograde trafficking and plasma membrane recycling pathways of the  
894 budding yeast *Saccharomyces cerevisiae*. *Traffic*. 2020;21: 45–59. doi:10.1111/tra.12693
- 895 56. Woods B, Lai H, Wu CF, Zyla TR, Savage NS, Lew DJ. Parallel Actin-Independent  
896 Recycling Pathways Polarize Cdc42 in Budding Yeast. *Curr Biol*. 2016;26: 2114–2126.  
897 doi:10.1016/j.cub.2016.06.047
- 898 57. Davis C, Dube P, Konopka JB. Afr1p Regulates the *Saccharomyces cerevisiae*-Factor  
899 Receptor by a Mechanism That Is Distinct From Receptor Phosphorylation and  
900 Endocytosis. *Genetics*. 1998.
- 901 58. Chen Q, Konopka JB. Regulation of the G-Protein-Coupled-Factor Pheromone Receptor  
902 by Phosphorylation. *Mol Cell Biol*. 1996. Available: <http://mcb.asm.org/>
- 903 59. Peñalva MA, Lucena-Agell D, Arst HN. Liaison alcaline: Pals entice non-endosomal  
904 ESCRTs to the plasma membrane for pH signaling. *Curr Opin Microbiol*. 2014;22: 49–59.  
905 doi:10.1016/J.MIB.2014.09.005
- 906 60. Obara K, Kihara A. Signaling events of the Rim101 pathway occur at the plasma  
907 membrane in a ubiquitination-dependent manner. *Mol Cell Biol*. 2014;34: 3525–34.  
908 doi:10.1128/MCB.00408-14
- 909 61. Lucena-Agell D, Hervás-Aguilar A, Múnera-Huertas T, Pougovkina O, Rudnicka J,  
910 Galindo A, et al. Mutational analysis of the *Aspergillus* ambient pH receptor PalH  
911 underscores its potential as a target for antifungal compounds. *Mol Microbiol*. 2016;101:  
912 982–1002. doi:10.1111/mmi.13438
- 913 62. Brown HE, Esher SK, Alspaugh JA. Chitin: A “Hidden Figure” in the Fungal Cell Wall.  
914 2019. doi:10.1007/82\_2019\_184
- 915 63. Farnoud AM, Bryan AM, Kechichian T, Luberto C, Poeta M Del. The Granuloma  
916 Response Controlling Cryptococcosis in Mice Depends on the Sphingosine Kinase 1-  
917 Sphingosine 1-Phosphate Pathway. 2015 [cited 25 Feb 2020]. doi:10.1128/IAI.00056-15
- 918 64. Obara K, Kihara A. The Rim101 pathway contributes to ER stress adaptation through  
919 sensing the state of plasma membrane. *Biochem J*. 2017;474: 51–63.  
920 doi:10.1042/BCJ20160580
- 921 65. Brach T, Godlee C, Moeller-Hansen I, Boeke D, Kaksonen M. The initiation of clathrin-  
922 mediated endocytosis is mechanistically highly flexible. *Curr Biol*. 2014;24: 548–554.  
923 doi:10.1016/j.cub.2014.01.048
- 924 66. Obara K, Yamamoto H, Kihara A. Membrane protein Rim21 plays a central role in  
925 sensing ambient pH in *Saccharomyces cerevisiae*. *J Biol Chem*. 2012;287: 38473–  
926 38481. doi:10.1074/jbc.M112.394205
- 927 67. Perfect JR, Lang SD, Durack DT. Chronic cryptococcal meningitis: a new experimental  
928 model in rabbits. *Am J Pathol*. 1980;101: 177–94. Available:  
929 <http://www.ncbi.nlm.nih.gov/pubmed/7004196>
- 930 68. Nielsen K, Cox GM, Wang P, Toffaletti DL, Perfect JR, Heitman J. Sexual cycle of  
931 *Cryptococcus neoformans* var. *grubii* and Virulence of congenic  $\alpha$  and  $\alpha$  isolates. *Infect*  
932 *Immun*. 2003;71: 4831–4841. doi:10.1128/IAI.71.9.4831-4841.2003
- 933 69. O’Meara TR, Norton D, Price MS, Hay C, Clements MF, Nichols CB, et al. Interaction of  
934 *Cryptococcus neoformans* Rim101 and protein kinase A regulates capsule. *PLoS Pathog*.  
935 2010;6: e1000776. doi:10.1371/journal.ppat.1000776

- 936 70. Schindelin J, Arganda-Carreras I, Frise E, Kaynig V, Longair M, Pietzsch T, et al. Fiji: an  
937 open-source platform for biological-image analysis. *Nat Methods*. 2012;9: 676–682.  
938 doi:10.1038/nmeth.2019
- 939 71. Cramer KL, Gerrald QD, Nichols CB, Price MS, Alspaugh JA. Transcription factor Nrg1  
940 mediates capsule formation, stress response, and pathogenesis in *Cryptococcus*  
941 *neoformans*. *Eukaryot Cell*. 2006;5: 1147–56. doi:10.1128/EC.00145-06
- 942 72. Singh A, MacKenzie A, Girmun G, Poeta M Del. Analysis of sphingolipids, sterols, and  
943 phospholipids in human pathogenic *Cryptococcus* strains. *J Lipid Res*. 2017;58: 2017–  
944 2036. doi:10.1194/jlr.M078600
- 945 73. Mandala SM, Thornton RA, Frommer BR, Curotto JE, Rozdilsky W, Kurtz MB, et al. The  
946 discovery of australifungin, a novel inhibitor of sphinganine N-acyltransferase from  
947 *Sporormiella australis*. Producing organism, fermentation, isolation, and biological  
948 activity. *J Antibiot (Tokyo)*. 1995;48: 349–56. doi:10.7164/antibiotics.48.349
- 949 74. Bligh EG, Dyer WJ. A rapid method of total lipid extraction and purification. *Can J*  
950 *Biochem Physiol*. 1959;37: 911–917. doi:10.1139/o59-099  
951

952 **Figure Legends**

953 **Fig 1.** Rra1 colocalizes with FM4-64 labeled structures.

954 A. The wildtype strain with GFP labeled Rra1 was treated with FM4-64 dye following a shift from  
955 pH 4 to pH 8 (SC medium buffered to pH 4 and 8 with Mcllvaine's buffer, referred to as Mcllvaine's  
956 medium) at room temperature. Localization of Rra1 (green) and FM4-64 (red) was visualized  
957 using epifluorescence microscopy at 10 and 20 minutes. Rra1-GFP colocalization events with  
958 FM4-64 near the plasma membrane are indicated by yellow triangles. Colocalization on  
959 endomembrane structures is indicated by white triangles. White scale bars indicate 5 microns.

960 B. pH-dependent localization and recycling of the Rra1-GFP fusion construct. The Rra1-GFP  
961 strain was incubated at pH 4 or pH 8 Mcllvaine's media for 60 minutes and then shifted back to  
962 pH 4 media for 30 minutes in the wildtype and *rim101*Δ strains. GFP signal was assessed by  
963 epifluorescence microscopy (Zeiss Axio Imager A1) using the appropriate filter. White scale bars  
964 indicate 5 microns.

965 C. Quantification of Rra1-GFP cell surface puncta at pH 4 and pH 8. The mean values and  
966 standard errors of cells with > 2 membrane puncta (MP) formed at pH 4 and 8 Mcllvaine's media  
967 for 60 minutes and then shifted back to pH 4 for 30 minutes was quantified using ImageJ software  
968 (Fiji) (~600 cells/condition; 3 biological replicates). One-way ANOVA, Tukey's multiple  
969 comparison test: \*\* =  $p = 0.0014$ , \* =  $p = 0.0267$ , ns = not significant.

970

971 **Fig 2.** Pitstop-2 inhibition of CME affects Rim signaling

972 A. Alterations in pH-dependent localization of the Rra1 protein GFP fusion protein by inhibition of  
973 CME in response to pH 8 Mcllvaine's medium for 10 minutes following treatment with either 20  
974 μM Pitstop-2 or DMSO. GFP signal was assessed by epifluorescence microscopy (Zeiss Axio  
975 Imager A1) using the appropriate filter. White arrows indicate clear endomembrane/ER  
976 localization. White scale bars indicate 5 microns.



977 B. Quantification of Rra1-GFP localization in pH 8 Mcllvaine's medium. The mean values and  
978 standard errors of cells with clear ER localization at pH 8 was quantified using ImageJ software  
979 (Fiji) (~600 cells/condition; 4 biological replicates). Student's *t*-test,  $p = 0.012$ .

980 C. Assessment of MIC of Pitstop-2 CME inhibitor on wildtype *C. neoformans* cells grown under  
981 increasingly alkaline conditions. MIC was determined after 72 hours of growth at 30°C by broth  
982 microdilution.

983 D. Quantification of pH-dependent nuclear localization of the Rim101 transcription factor in  
984 response to pH 4 and pH 8 Mcllvaine's media for 10 minutes following treatment with either  
985 Pitstop-2 (20  $\mu$ M or 42  $\mu$ M) or DMSO. The mean values and standard errors of cells with clear  
986 nuclear localization at pH 8 was quantified using ImageJ software (Fiji) (~600 cells/condition; 3  
987 biological replicates). One-way ANOVA, Tukey's multiple comparison test: \*\*\*\* =  $p < 0.0001$ .

988 White scale bars indicate 5 microns.

989

990 **Fig 3. Upstream Rim pathway components interact with endocytosis machinery at high pH**

991 Following incubation of the GFP-Rra1-Ct and the Rim23-GFP expressing strains in alkaline  
992 conditions (YPD pH 8) for one hour, cell lysates were immunoprecipitated using a GFP-Trap resin.

993 The associated proteins were analyzed using tandem MS-MS. These interactomes were then  
994 analyzed with FungiFun software to identify significantly enriched Gene Ontology categories. (A)

995 FunCat analysis from the Rra1-Ct and Rim23 interactomes and the inset of the Rim23 FunCat  
996 results represents the subcategories within the umbrella cellular transport. (B) GO-term analysis

997 on the enriched cellular compartments for the two interactomes. The specific CNAG #s and gene  
998 names in each category can be found in Tables 1 and 2, and the full interactomes can be found

999 in Table S1.

1000

1001 **Fig 4. Reduced Rra1-containing membrane puncta at low pH in the *sre1* $\Delta$  mutant strain**

1002 A. pH-dependent localization of the Rra1-GFP protein fusion construct in response to pH 4 and  
1003 pH 8 Mcllvaine's media for 60 minutes in the wildtype and *sre1* $\Delta$  mutant backgrounds. GFP signal  
1004 was assessed by epifluorescence microscopy (Zeiss Axio Imager A1) using the appropriate filter.  
1005 White scale bars indicate 5 microns.  
1006 B. Quantification of Rra1-GFP localization at pH 4 and pH 8. The mean values and standard  
1007 errors of cells with > 2 membrane puncta formed at pH 4 and 8 was quantified using ImageJ  
1008 software (Fiji) (~600 cells/condition; 3 biological replicates). One-way ANOVA, Tukey's multiple  
1009 comparison test: \*\* =  $p < 0.0095$ .

1010

1011 **Fig 5. Rra1 phosphomutant affects Rra1 localization, but not function**

1012 A. Schematic of the pH-dependent phosphosites of the Rra1 protein. Sites that are preferentially  
1013 phosphorylated at pH 4 are depicted in black and sites preferentially phosphorylated at pH 8 are  
1014 depicted in teal. Sites that were also predicted to be phosphorylated using DEPP software are  
1015 labeled with "DEPP". The highly charged region that has been shown to be essential for Rra1  
1016 function and proper localization is indicated in fuchsia.

1017 B. The prioritized alkaline phosphorylation site mutants, incubated overnight in YPD medium,  
1018 were serially diluted onto YPD and YPD pH 8 agar plates to assess growth rate compared to  
1019 wildtype, the *rra1* $\Delta$  mutant strain, and the Rra1-GFP strain. Plates were incubated at 30° C for 3  
1020 days prior to imaging.

1021 C. The Rra1-GFP wildtype and the Rra1-GFP T317A phosphomutant strains were incubated in  
1022 pH 4 and pH 8 Mcllvaine's media for 60 minutes. Rra1-GFP localization was assessed by  
1023 epifluorescence microscopy (Zeiss Axio Imager A1) using the appropriate filter. White scale bars  
1024 indicate 5 microns.

1025 D. Quantification of Rra1-GFP localization at pH 4 and pH 8 in the Rra1-GFP wildtype and T317A  
1026 phosphomutant backgrounds. The mean values and standard errors of cells with > 2 membrane  
1027 puncta formed at pH 4 (grey) and 8 (teal) Mcllvaine's buffer for 60 minutes was quantified using

1028 ImageJ software (Fiji) (~600 cells/condition; 3 biological replicates). One-way ANOVA, Tukey's  
1029 multiple comparison test: \* =  $p = 0.0165$ , \*\* =  $p < 0.0038$

1030 E. Western blot analysis of Rra1 protein levels in different genetic backgrounds: wildtype, the  
1031 Rra1-296T truncation mutant that retains the HCR, and the T317A phosphomutant. Strains were  
1032 incubated for 1.5 h in pH 8 YPD buffered with 150 mM HEPES. Samples were assessed by  
1033 western blotting using an  $\alpha$ -GFP antibody. White scale bars indicate 5 microns.

1034 F. Comparison of the Rra1-GFP T317A phosphomutant to the truncation mutants, *rra1* $\Delta$  and  
1035 wildtype strains and their respective growth on acidic and alkaline pH. Strains were serially diluted  
1036 onto YPD and YPD pH 8, and YPD pH 4 agar plates to assess growth rates in pH stress. Plates  
1037 were incubated at 30° C for 3 days prior to imaging.

1038

1039 **Fig 6.** pH-dependent phospholipid analysis.

1040 The wildtype *C. neoformans* strain was incubated in pH 4 (grey) or pH 8 (teal) YNB media prior  
1041 to lipid extraction. Graphs represent lipid profile comparisons of the most abundant (A)  
1042 phosphatidylethanolamine (PE) (B) phosphatidylserine (PS) and (C) phosphatidylcholine (PC)  
1043 species analyzed. Two-way ANOVA, Sidak's multiple comparison test: \*\*\*\*  $p < 0.0001$ , \*\*\*  $p <$   
1044  $0.005$ , \*\*  $p < 0.007$ , \*  $p = 0.01$ . Statistical tests were run on all lipid species analyzed in biological  
1045 triplicate using GraphPad Prism. # represents unsaturated lipid species. The wildtype (black),  
1046 *rim101* $\Delta$  mutant (teal) and *rim101* $\Delta$  + *RIM101* (dark grey) reconstituted strains were incubated in  
1047 pH 8 YNB media prior to lipid extraction. Graphs represent lipid profile comparisons of the most  
1048 abundant (D) phosphatidylserine (PS) and (E) phosphatidylcholine (PC) species analyzed. Two-  
1049 way ANOVA, Tukey's multiple comparison test: \*\*\*\*  $p < 0.0001$ , \*\*\*  $p < 0.0002$ , \*\*  $p < 0.0021$ , \*  $p$   
1050  $= 0.0332$ . Statistical tests were run on all lipid species analyzed in biological triplicate using  
1051 GraphPad Prism. # represents unsaturated lipid species.

1052 F) The wildtype and *rim101* $\Delta$  mutant strains were serially diluted onto YPD and YPD pH 8 +/-  
1053 glycerol agar plates to assess growth rate. Plates were incubated at 30° C for 3 days prior to  
1054 imaging.

1055

1056 **Fig 7.** Model of Rra1 cycling resulting in pH-mediated Rim pathway activation. In response to  
1057 increases in extracellular pH, the Rra1 pH-sensing protein undergoes clathrin-mediated  
1058 endocytosis from its resting location in sterol-rich PM domains (1-3), re-localizing to  
1059 endomembranes. At that site, Rra1 assists in the ESCRT-directed assembly of the Rim  
1060 Proteolysis Complex (4-5a), activating the Rim101 transcription factor to translocate to the  
1061 nucleus where it controls the expression of its target genes (5b). Recycling back to the PM occurs  
1062 at more acidic pH (steps 6-13).

1063

1064 **Fig S1. Rra1 membrane puncta are unaffected by inhibition of clathrin-mediated**  
1065 **endocytosis at low pH**

1066 A. pH-dependent localization of the Rra1-GFP fusion protein in response to pH 4 and pH 8  
1067 McIlvaine's media for 10 minutes following treatment with either 20  $\mu$ M Pitstop-2 or DMSO. GFP  
1068 signal was assessed by epifluorescence microscopy (Zeiss Axio Imager A1) using the appropriate  
1069 filter. Long white arrows indicate cells with > 2 membrane puncta (MP), Asterisks indicate cells  
1070 containing intermediate localization, and short white arrows indicate clear endomembrane/ER  
1071 localization. White scale bars indicate 5 microns.

1072 B. Quantification of Rra1-GFP localization at pH 4 and pH 8. The mean values and standard  
1073 errors of cells with clear ER localization at pH 8 was quantified using ImageJ software (Fiji) (~600  
1074 cells/condition; 4 biological replicates). One-way ANOVA Tukey's multiple comparison test: No  
1075 significant difference (ns) between Rra1 MP at pH 4 between untreated and treated groups.

1076

1077 **Fig S2. Predictive modeling of the Rra1 protein**

1078 Prediction software Itasser (Iterative Threading ASSEmbly Refinement) used a hierarchical  
1079 approach to model the most likely configurations of the Rra1 protein according to its amino acid  
1080 sequence. (A) represents the first predicted model of Rra1 and has a C-score of -1.70 (range  
1081 between -5 and 2, with higher scores representing higher confidence). (B) represents the second  
1082 most likely modeled configuration of the protein, with a lower C-score of -2.31. Both secondary  
1083 structures with C-terminal tails highlighted in teal and space fill models are shown for each  
1084 predicted model (generated in Protean 3D software using Itasser predictions).  
1085 C. Schematic of the Rra1 protein functional domains and PONDR predicted disordered regions.  
1086 Rainbow colors correspond with the 7 predicted transmembrane domains in the space-filled  
1087 models in (A) and (B) as well as with the transmembrane domain prediction as analyzed by  
1088 Protean 3D software using Von Heijne modeling in (D). A separate disorder prediction software  
1089 (JRONN) was also run through Protean 3D revealing the highly disordered C-terminal tail (E).

1090

### 1091 **Fig S3. Rra1 cycling and pathway activation in the T317A mutant**

1092 A. pH-dependent localization and recycling of the Rra1 protein GFP fusion construct in response  
1093 to pH 4 and pH 8 Mcllvaine's media for 30 minutes and then back to pH 4 media for 30 minutes  
1094 in the wildtype and T317A phosphomutant backgrounds. GFP signal was assessed by  
1095 epifluorescence microscopy (Zeiss Axio Imager A1) using the appropriate filter. White scale bars  
1096 indicate 5 microns. Quantification of Rra1-GFP localization at pH 4 and pH 8. The mean values  
1097 and standard errors of cells with > 2 membrane puncta formed at pH 4 and 8 was quantified using  
1098 ImageJ software (Fiji) (~600 cells/condition; 3 biological replicates). One-way ANOVA Tukey's  
1099 multiple comparison test: \*\*\* =  $p = 0.0009$

1100 Quantitative Realtime PCR analysis of (B) *RRA1* and (C) a known Rim pathway output, *CIG1*, in  
1101 the wildtype, *rra1* $\Delta$ , *rra1* $\Delta$  + Rra1-GFP, and *rra1* $\Delta$  + Rra1-GFP + T317A phosphomutant. Strains  
1102 were incubated in YPD pH 8 conditions for 1.5 hours prior to RNA-extraction (in biological

1103 triplicate) and analysis of transcript abundance by PCR.  $\log_2$  fold change of *CIG1* expression of  
1104 the various strains is indicated compared to wildtype.

1105

1106 **Table S1:** Proteomics data.

1107 Page 1. List of the prioritized GFP-Rra1-Ct interactors at pH 8 compared to untagged control.

1108 Page 2. List of prioritized GFP-Rra1-Ct interactors with assigned FunCat categories.

1109 Page 3. List of prioritized GFP-Rra1-Ct interactors with assigned GO Cellular Compartment  
1110 categories.

1111 Page 4. List of the prioritized Rim23-GFP interactors at pH 8 compared to untagged control.

1112 Page 5. List of prioritized Rim23-GFP interactors with assigned FunCat categories.

1113 Page 6. List of prioritized Rim23-GFP interactors with assigned GO Cellular Compartment  
1114 categories.

1115

1116 **Table S2: Phospholipidomics data**

1117 Phosphatidylcholine (page 1), phosphatidylserine (page 2), and phosphatidylethanolamine (page  
1118 3) lipid species in the wildtype, *rim101* $\Delta$ , and *rim101* $\Delta$  + *RIM101* strains at pH 4 and pH 8.

1119

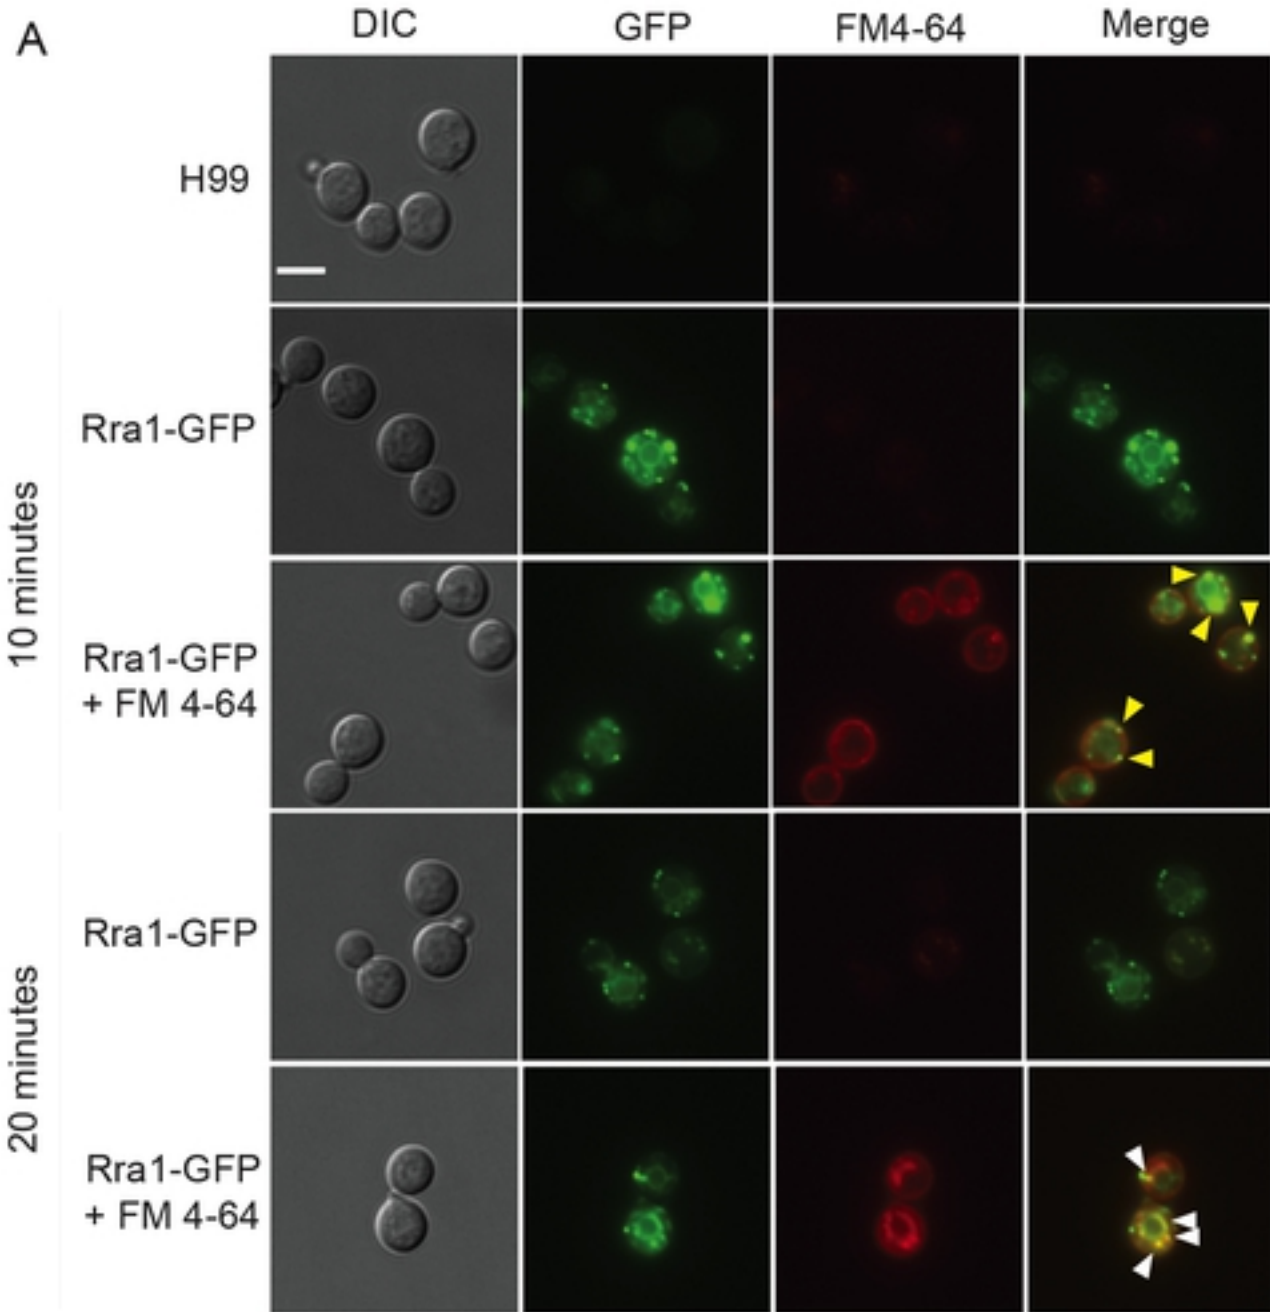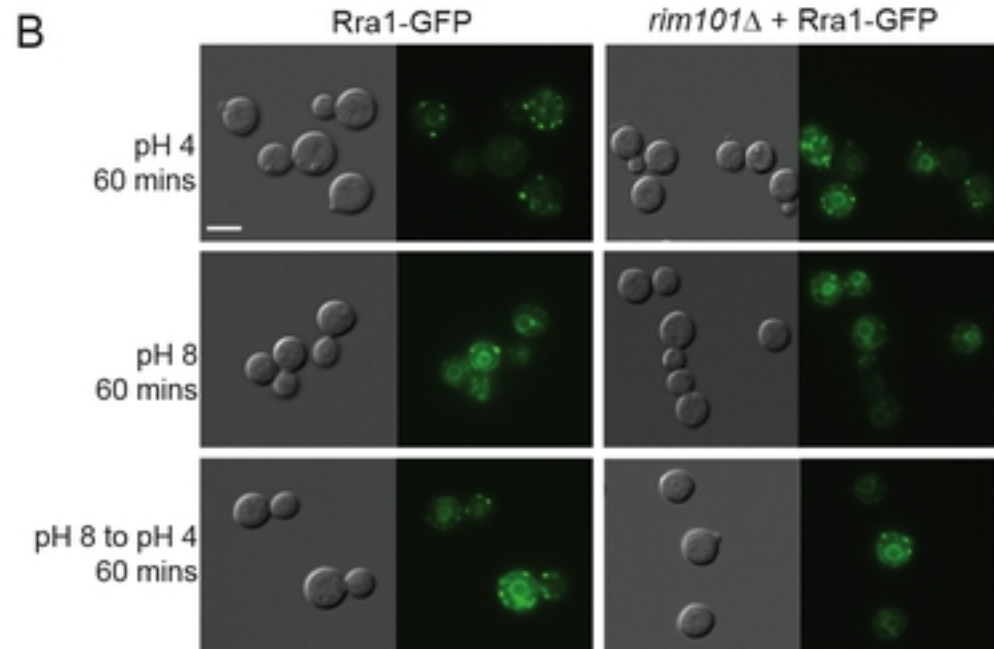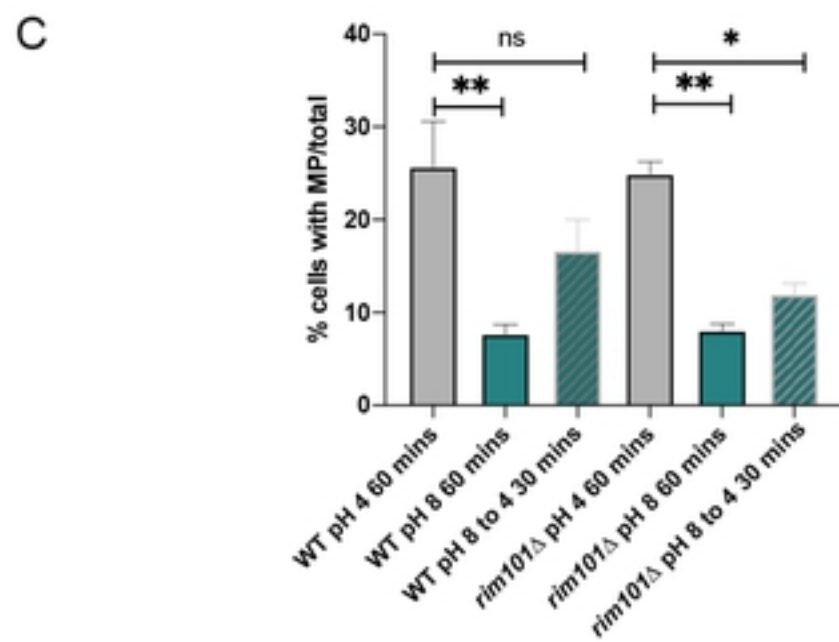

**Fig 1**



A

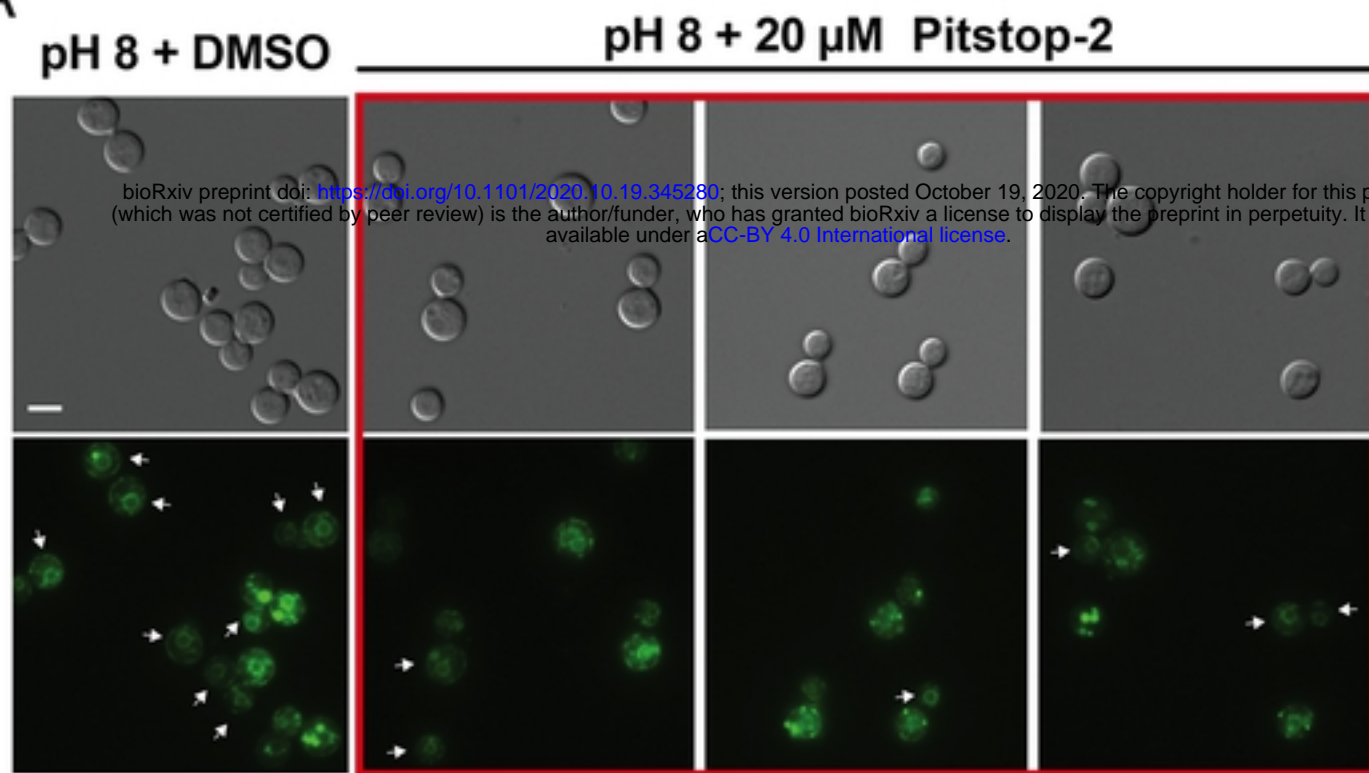

↑ = Clear Rra1 ER Localization

B

Pitstop treatment inhibits Rra1 pH-dependent ER localization

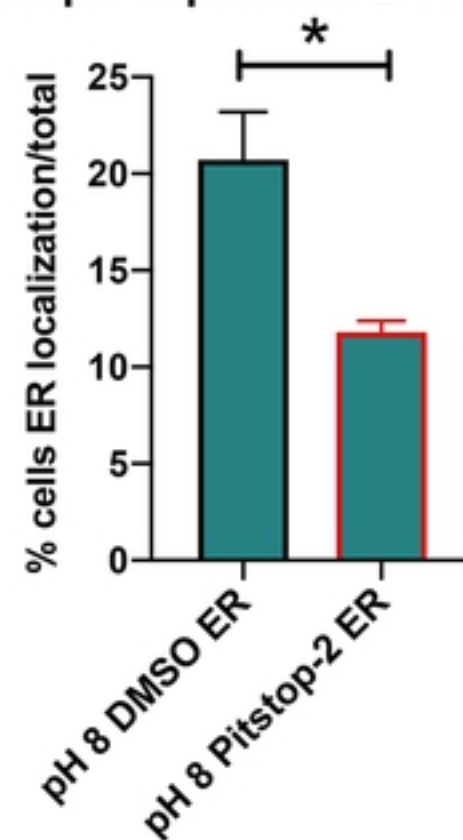

C

| Condition | Pitstop-2 MIC (uM) |
|-----------|--------------------|
| pH 6.6    | > 108              |
| pH 6.8    | 108                |
| pH 7      | 27.2               |
| pH 7.2    | 13.6               |
| pH 7.4    | 3.4                |

D

Pitstop treatment inhibits Rim101 pH-dependent nuclear localization

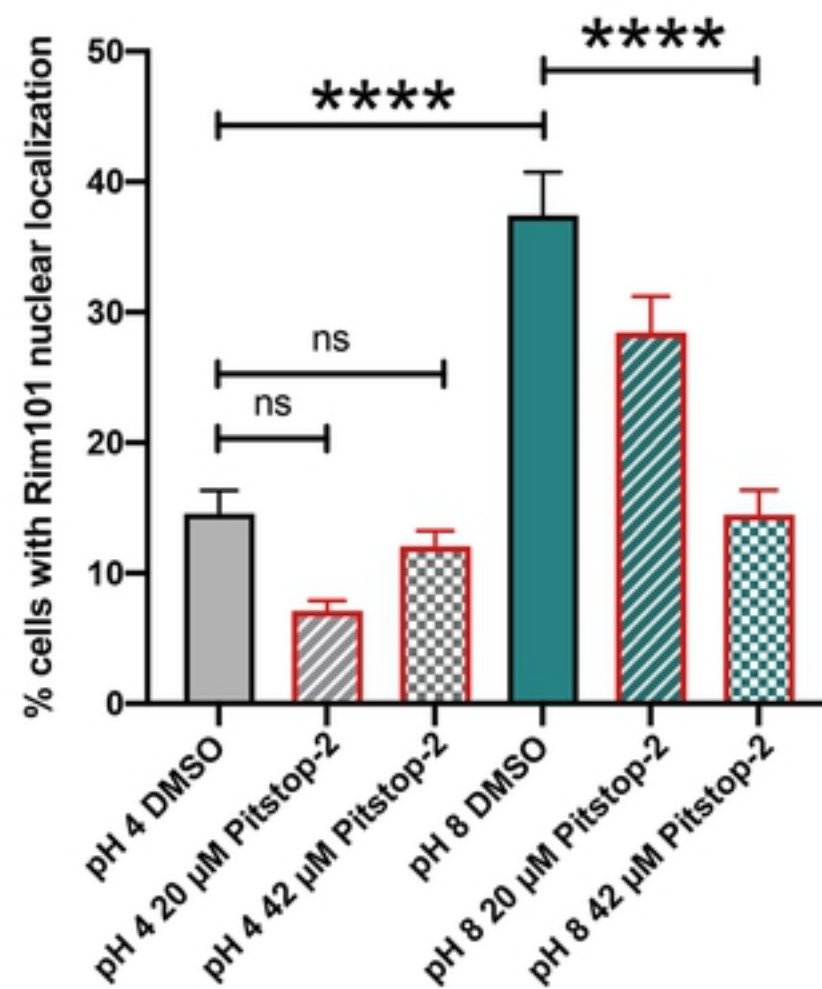

Fig 2

A

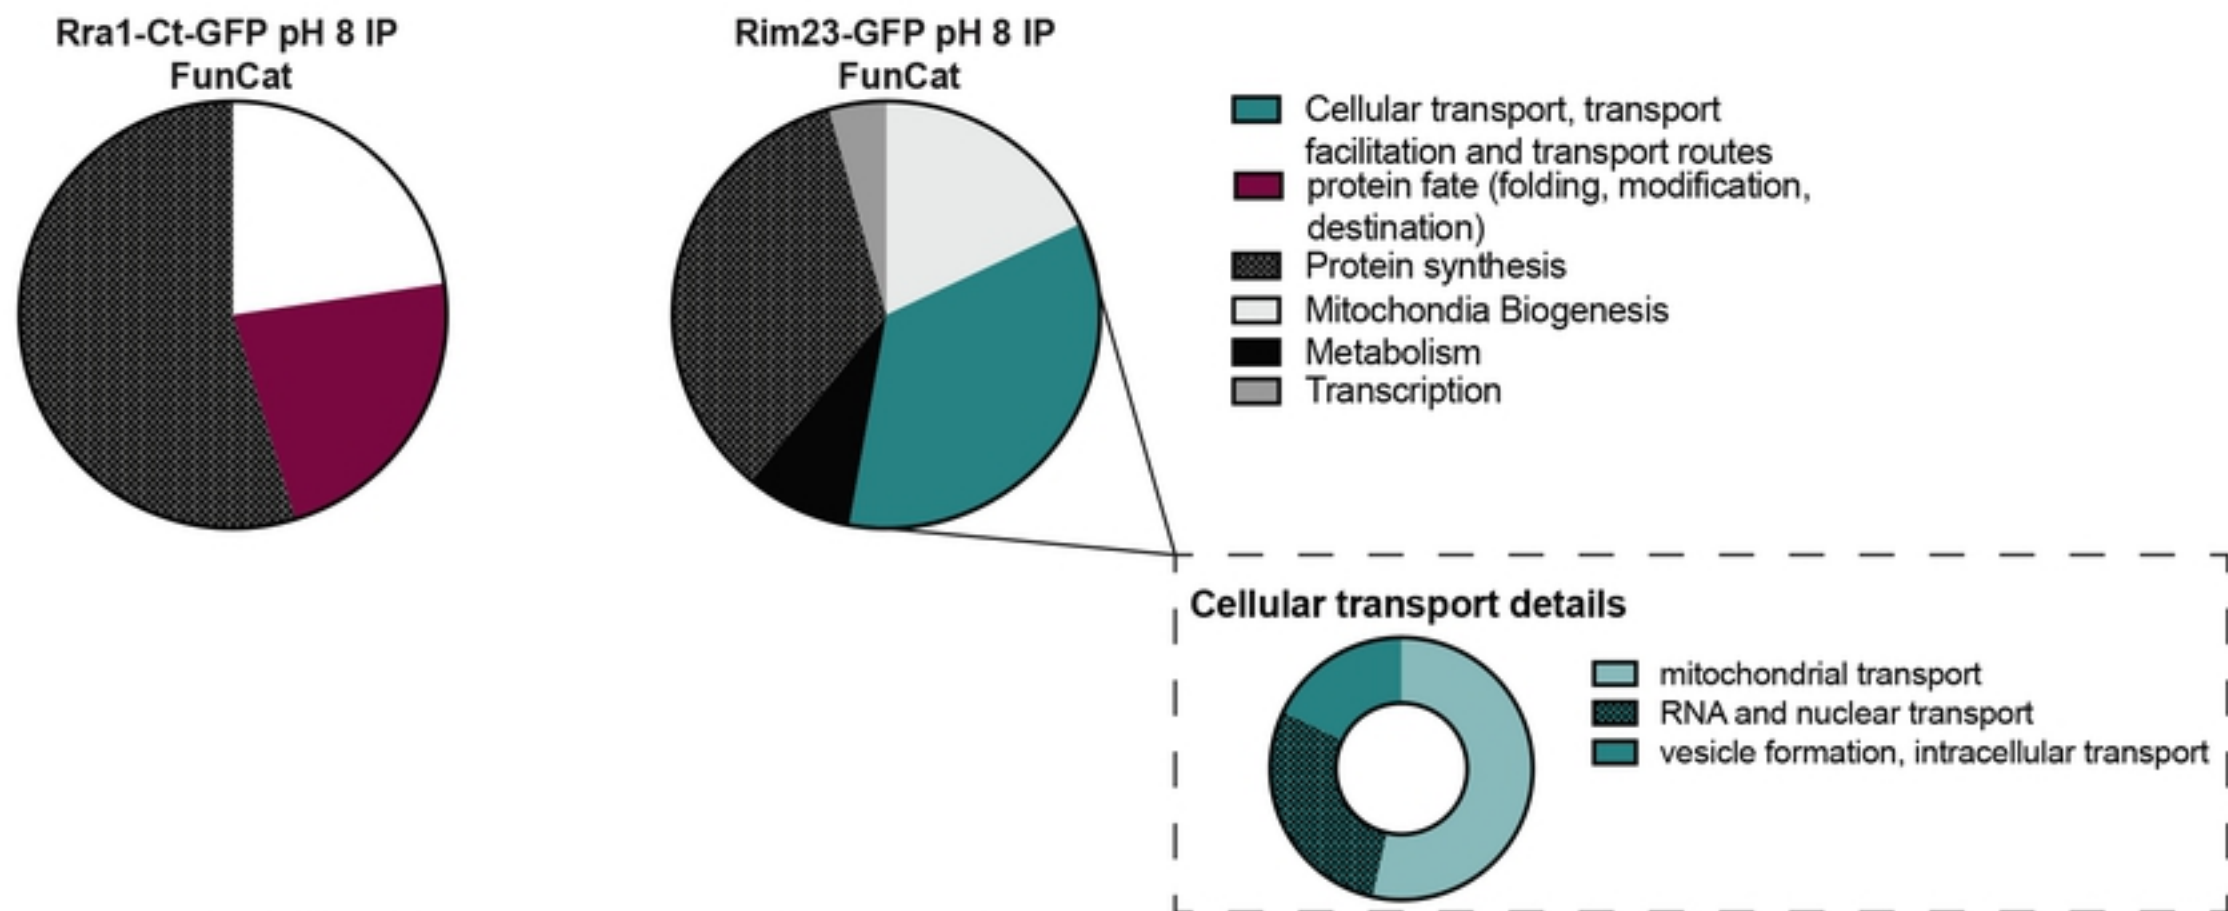

B

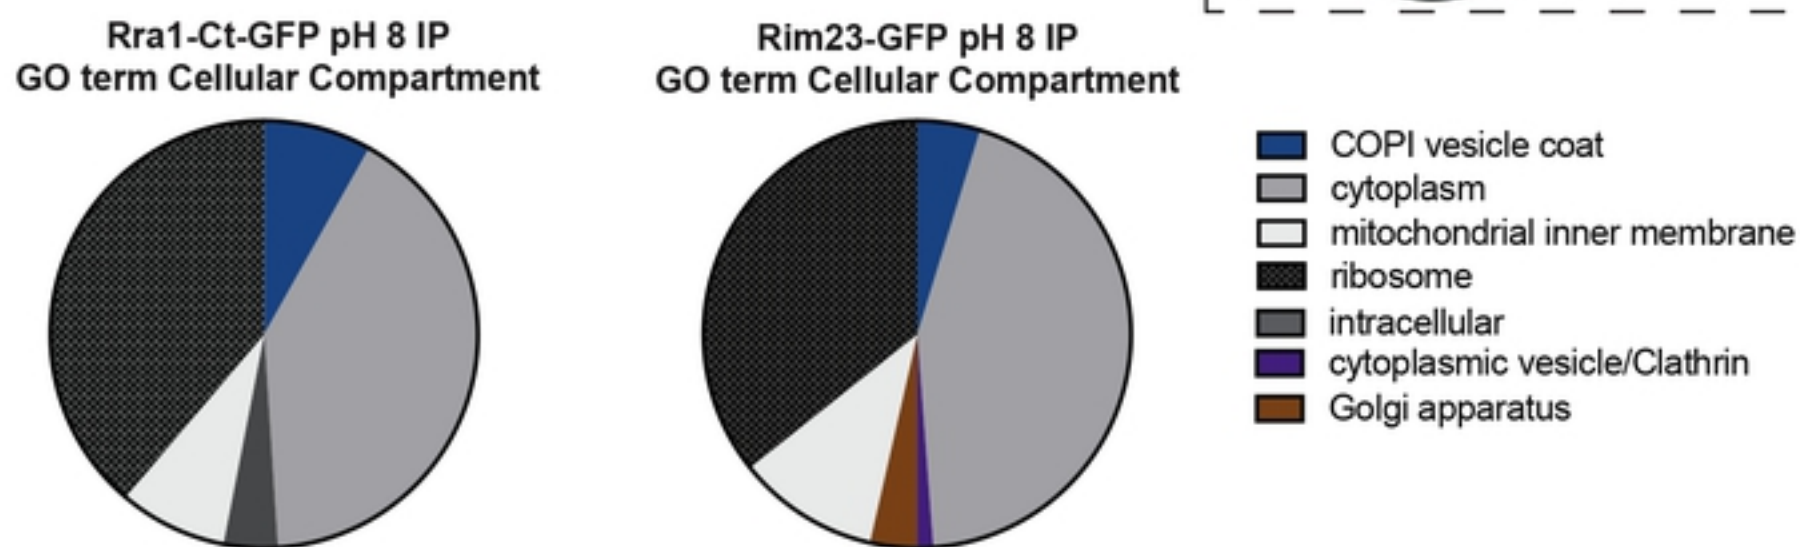

Fig 3

A

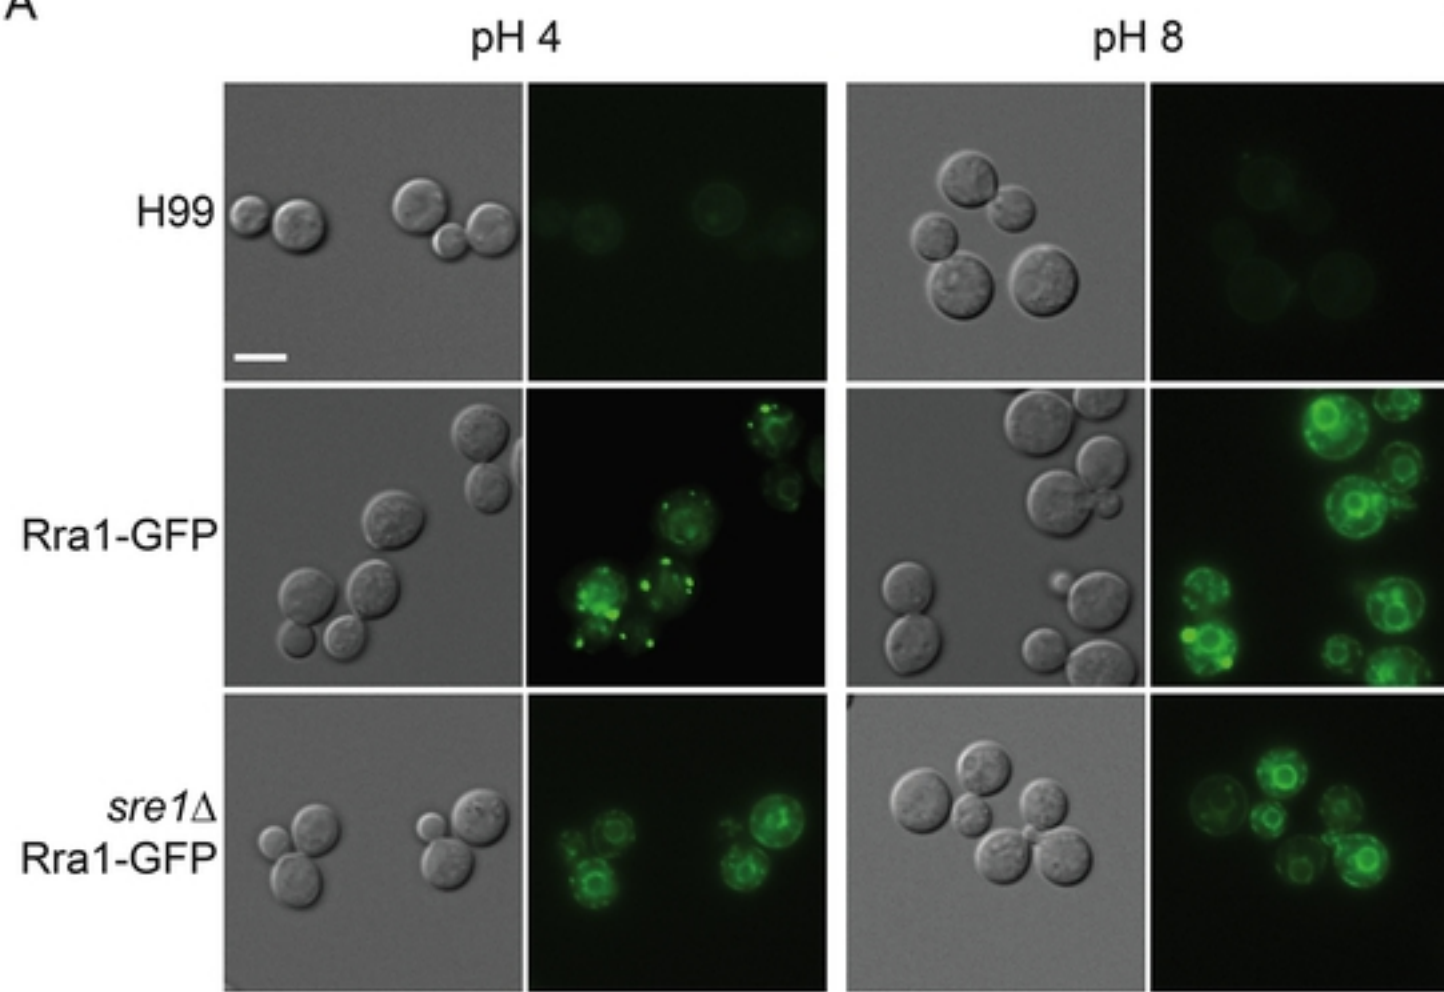

B

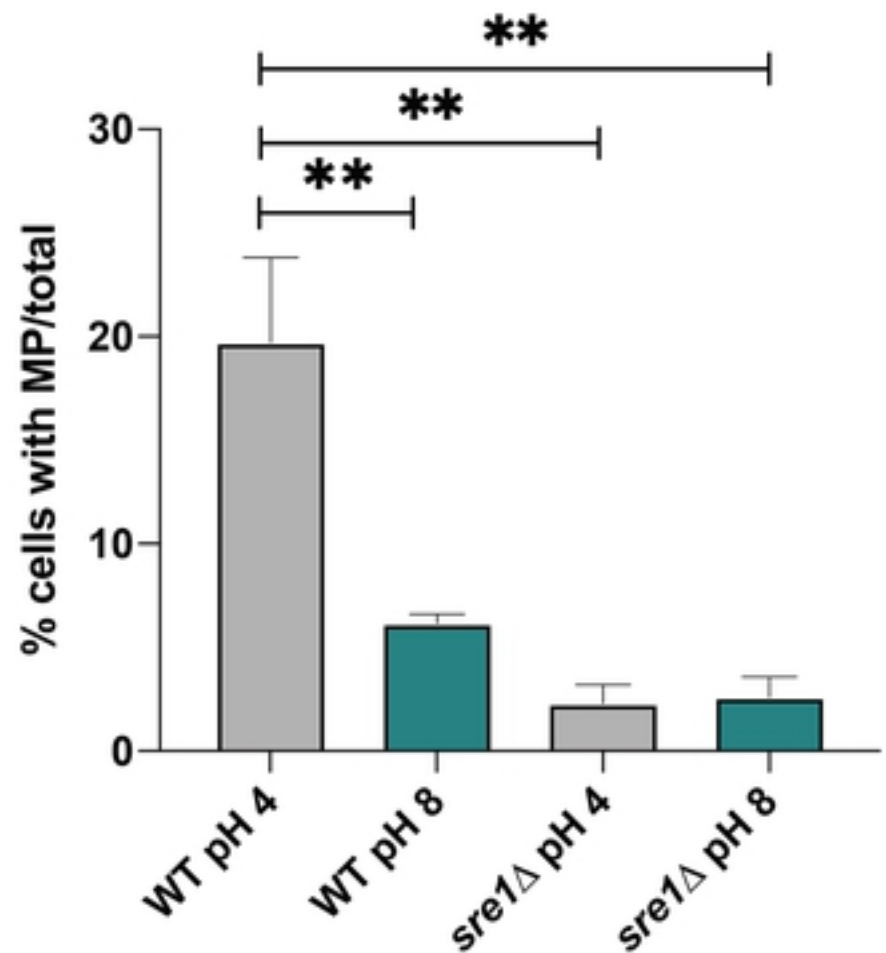

Fig 4



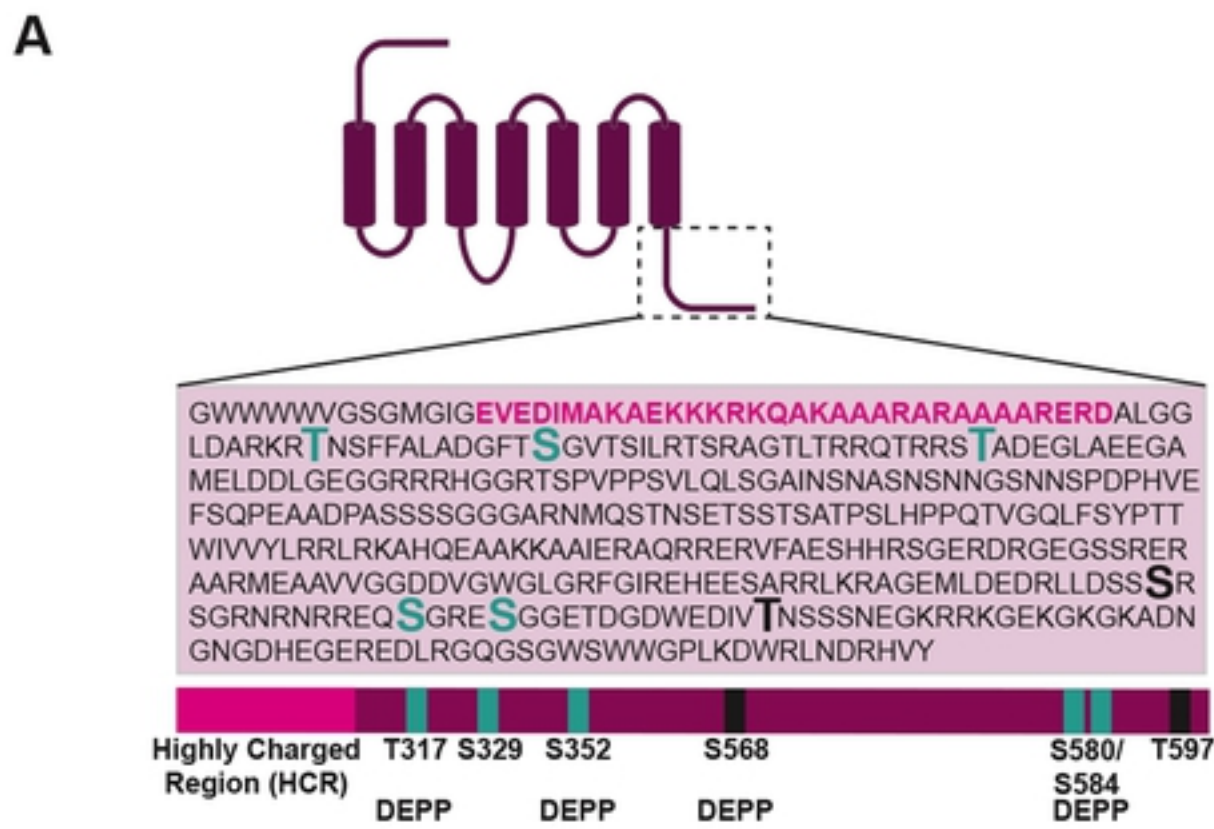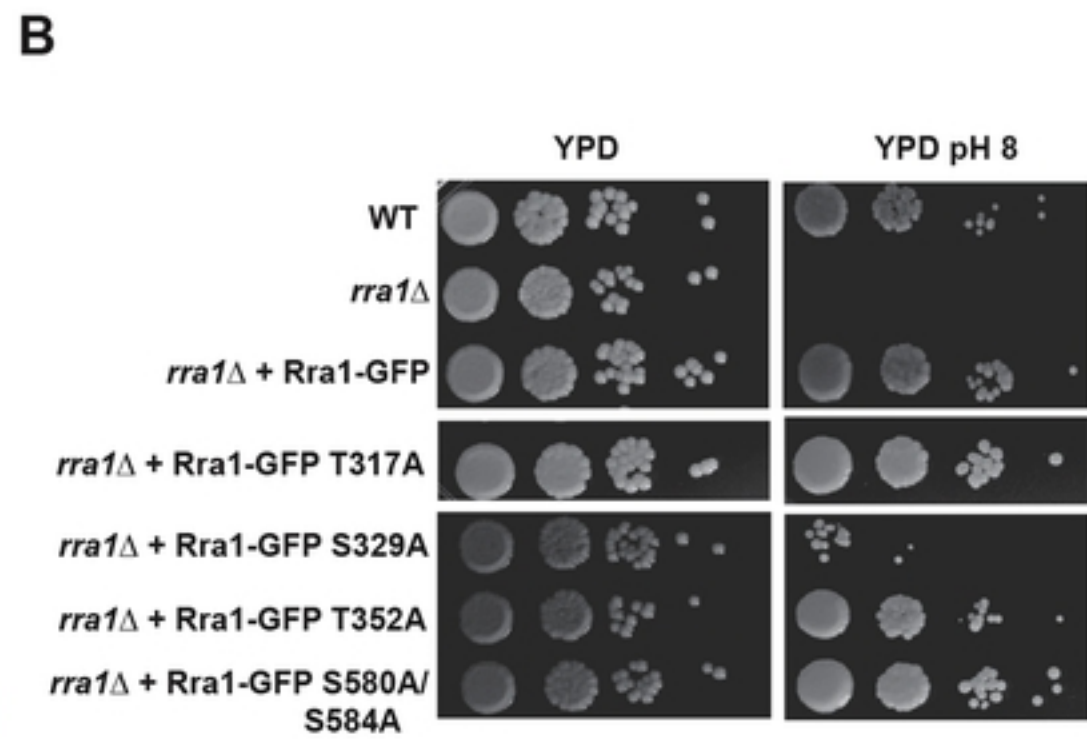

**C** bioRxiv preprint doi: <https://doi.org/10.1101/2020.10.19.345280>; this version posted October 19, 2020. The copyright holder for this preprint (which was not certified by peer review) is the author/funder, who has granted bioRxiv a license to display the preprint in perpetuity. It is made available under aCC-BY 4.0 International license.

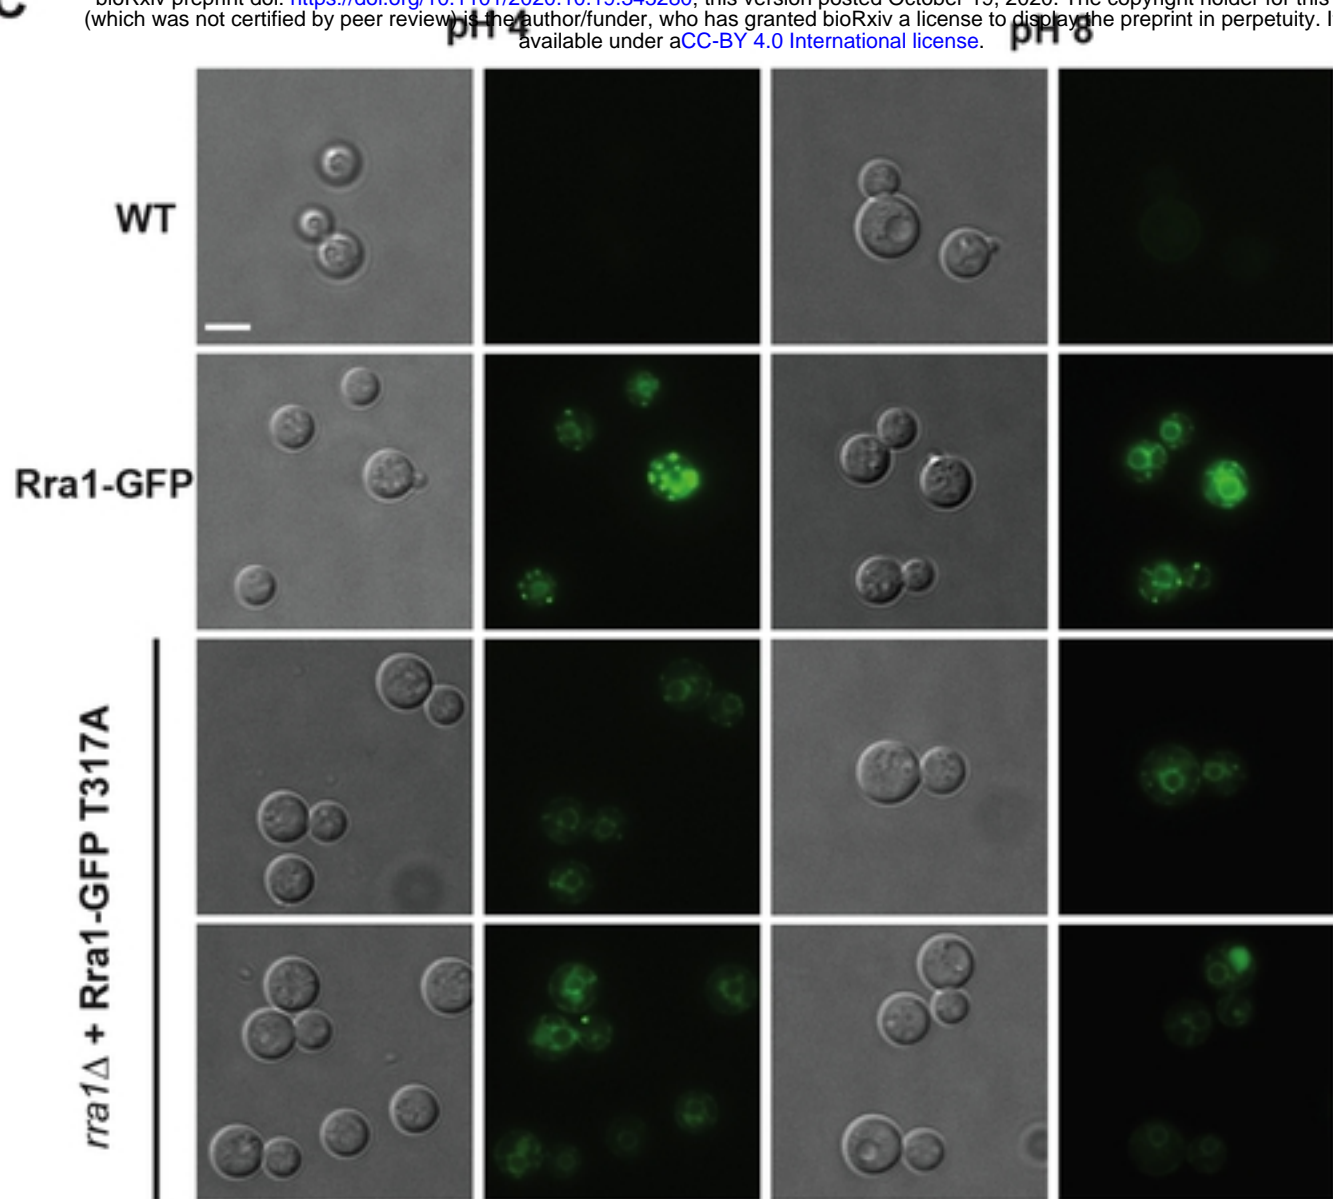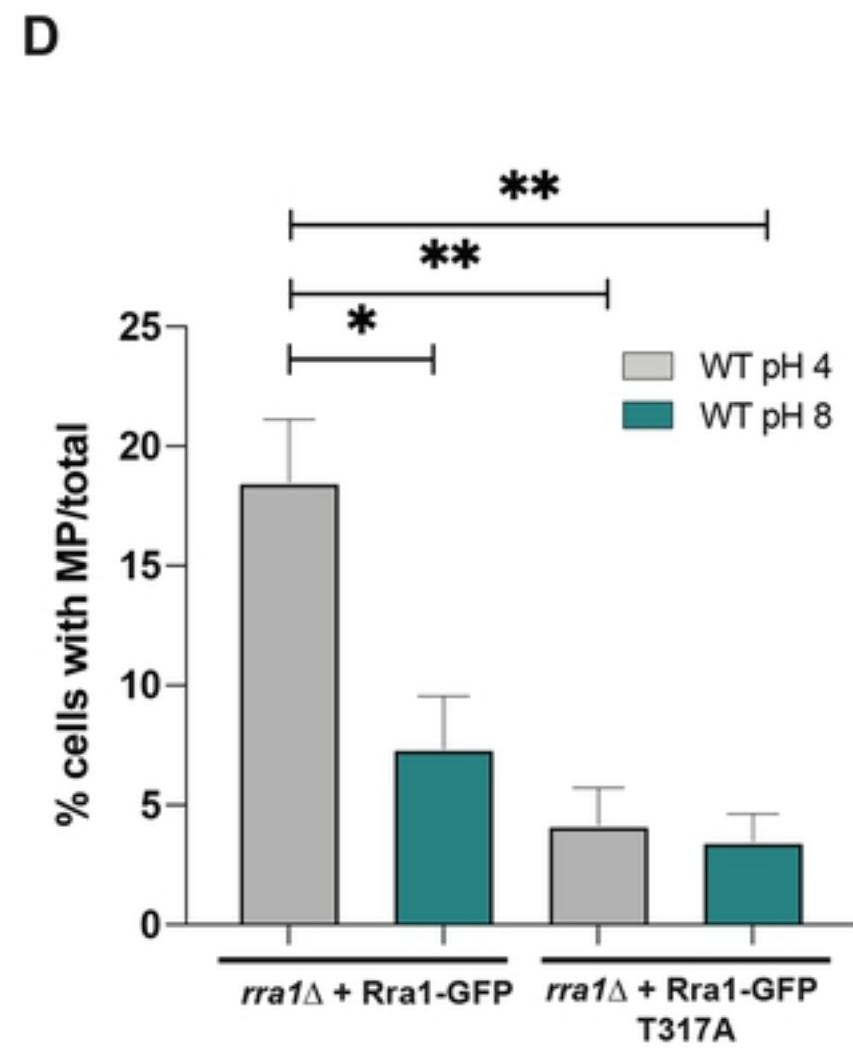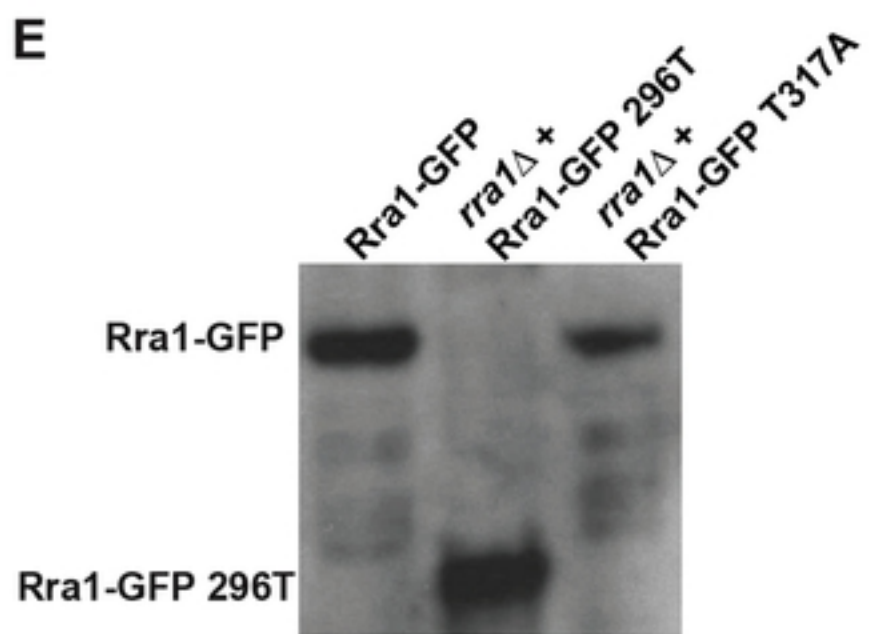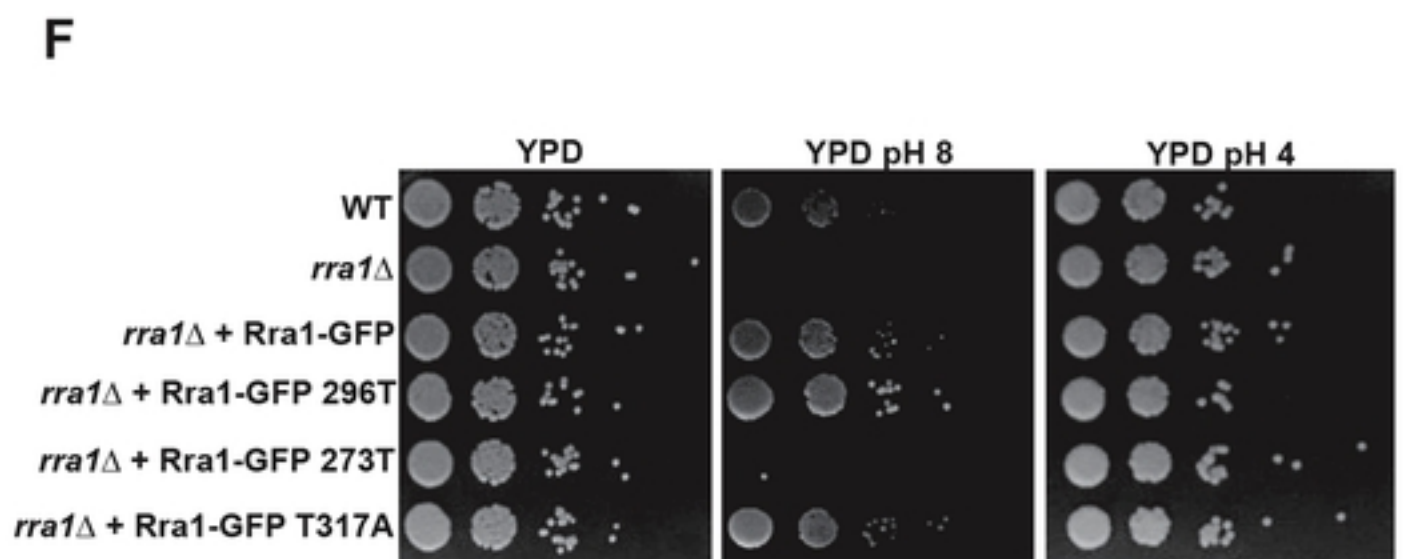

Fig 5





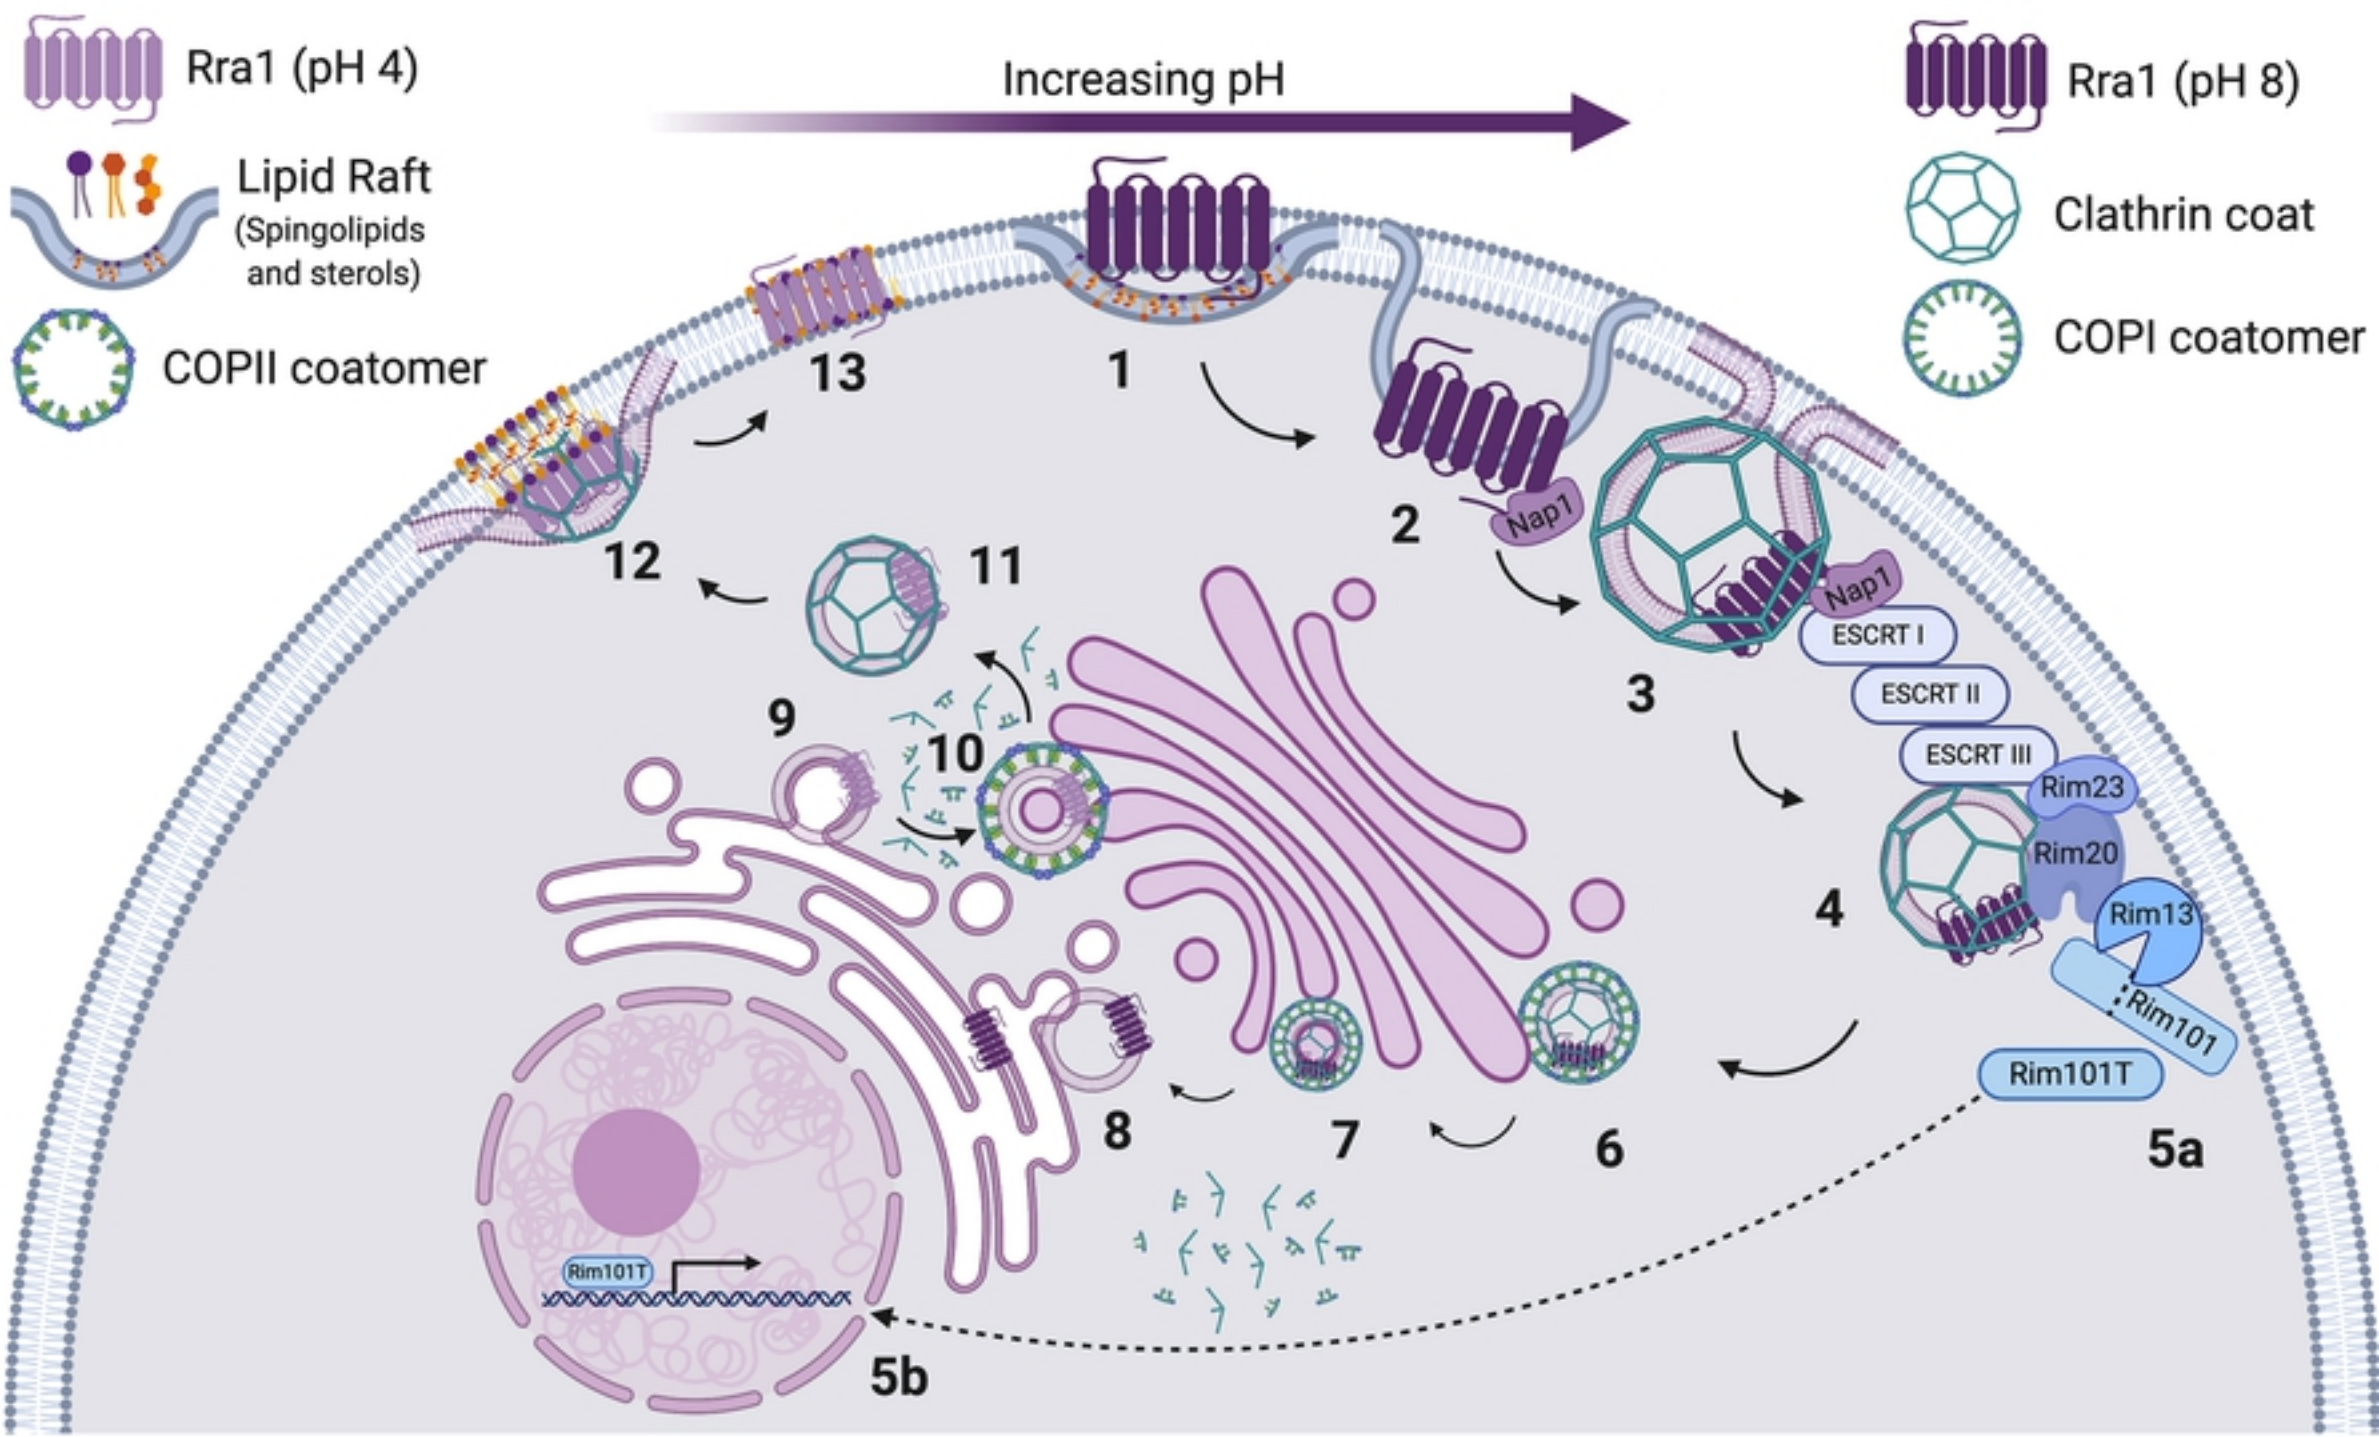

Fig 7
